# Supplementary material for: Probing the origins of activation barriers in nitrous oxide capture reactions by analyzing Lewis acid–base pairs with dimethylxanthene-linked group-13 (P) and group-15 (B) elements
Source: Royal Society of Chemistry journal article supplement (doi:10.1039/d4nj02176b), 2024-01-01
Supplement: d4nj02176b1.pdf [file d4nj02176b1.pdf]

# Supporting Information

## Probing the Origins of Activation Barriers in Nitrous Oxide Capture Reactions by Analyzing Lewis Acid-Base Pairs with Dimethylxanthene-Linked Group-13 (P) and Group-15 (B) Elements

Zheng-Feng Zhang<sup>1</sup> and Ming-Der Su<sup>1,2\*</sup>

<sup>1</sup>Department of Applied Chemistry, National Chiayi University,  
Chiayi 60004, Taiwan

<sup>2</sup>Department of Medicinal and Applied Chemistry, Kaohsiung Medical  
University, Kaohsiung 80708, Taiwan

\*E-mail: [midesu@mail.ncyu.edu.tw](mailto:midesu@mail.ncyu.edu.tw)



**Table S1.** The bonding energy between intramolecular dimethylxanthene-based **B/G15-Rea** and N<sub>2</sub>O in **B/G15-TS** was analyzed using energy decomposition analysis at the ZORA-B3LYP-D3(BJ)/TZ2P//B3LYP-D3(BJ)/def2-TZVP level. The EDA-NOCV analysis considered both singlet and triplet spin states, and the energy values are presented in kcal/mol.

| Molecules                        | B/N-TS              |                     | B/P-TS              |                     | B/As-TS             |                     | B/Sb-TS             |                     | B/Bi-TS             |                     |
|----------------------------------|---------------------|---------------------|---------------------|---------------------|---------------------|---------------------|---------------------|---------------------|---------------------|---------------------|
|                                  | B/N-Rea(S)          | B/N-Rea(T)          | B/P-Rea(S)          | B/P-Rea(T)          | B/As-Rea(S)         | B/As-Rea(T)         | B/Sb-Rea(S)         | B/Sb-Rea(T)         | B/Bi-Rea(S)         | B/Bi-Rea(T)         |
|                                  | +                   | +                   | +                   | +                   | +                   | +                   | +                   | +                   | +                   | +                   |
|                                  | N <sub>2</sub> O(S) | N <sub>2</sub> O(T) |
| $\Delta E_{\text{INT}}^{(a)}$    | -58.3               | -94.5               | -27.7               | -142.5              | -26.1               | -142.6              | -23.3               | -138.6              | -24.9               | -134.4              |
| $\Delta E_{\text{Pauli}}$        | 336.1               | 430.6               | 139.4               | 225.3               | 139.8               | 224.1               | 124.7               | 193.3               | 150.5               | 237.0               |
| $\Delta E_{\text{Elstat}}^{(b)}$ | -167.6<br>(42.5 %)  | -199.0<br>(37.9 %)  | -65.9<br>(39.4 %)   | -109.8<br>(29.9 %)  | -65.8<br>(39.7 %)   | -109.2<br>(29.8 %)  | -59.2<br>(40.0 %)   | -94.3<br>(28.4 %)   | -70.4<br>(40.5 %)   | -115.3<br>(31.0%)   |
| $\Delta E_{\text{Orb}}^{(b)}$    | -213.8<br>(54.2 %)  | -313.1<br>(59.6 %)  | -89.6<br>(53.6 %)   | -246.4<br>(67.0 %)  | -89.1<br>(53.7 %)   | -246.5<br>(67.2 %)  | -78.9<br>(53.3 %)   | -227.7<br>(68.6 %)  | -95.7<br>(54.2 %)   | -246.7<br>(66.4 %)  |
| $\Delta E_{\text{Orb}(1)}^{(c)}$ | -100.1<br>(46.8 %)  | -219.9<br>(70.2 %)  | -52.8<br>(58.9 %)   | -210.4<br>(85.4 %)  | -47.7<br>(53.5 %)   | -67.2<br>(85.2 %)   | -46.6<br>(59.1 %)   | -196.1<br>(86.1 %)  | -58.8<br>(61.4 %)   | -66.4<br>(84.0 %)   |
| $\Delta E_{\text{Orb}(2)}^{(c)}$ | -73.9<br>(34.6 %)   | -57.1<br>(18.2 %)   | -21.2<br>(23.7 %)   | -18.5<br>(7.5 %)    | -33.0<br>(37.0 %)   | -209.9<br>(7.7 %)   | -29.0<br>(36.8 %)   | -16.3<br>(7.2 %)    | -33.5<br>(35.0 %)   | -207.3<br>(8.5 %)   |
| $\Delta E_{\text{Rest}}^{(c)}$   | -39.8<br>(18.6 %)   | -36.2<br>(11.5 %)   | -15.6<br>(17.4 %)   | -17.5<br>(7.1 %)    | -8.4<br>(9.4 %)     | -17.5<br>(7.1 %)    | -3.3<br>(4.1 %)     | -15.3<br>(6.7 %)    | -3.4<br>(3.6 %)     | -18.4<br>(7.5 %)    |
| $\Delta E_{\text{Disper}}^{(b)}$ | -13.0<br>(3.3 %)    | -13.0<br>(2.5 %)    | -11.6<br>(7.0 %)    | -11.6<br>(3.2 %)    | -11.0<br>(6.6 %)    | -11.0<br>(3.0 %)    | -9.9<br>(6.7 %)     | -9.9<br>(3.0 %)     | -9.4<br>(5.3 %)     | -9.4<br>(2.5 %)     |

(a)  $\Delta E_{\text{INT}} = \Delta E_{\text{Elstat}} + \Delta E_{\text{Pauli}} + \Delta E_{\text{Orb}} + \Delta E_{\text{Disper}}$

(b) The values presented in parentheses represent the percentage contribution to the overall attractive interactions,  $\Delta E_{\text{Elstat}} + \Delta E_{\text{Orb}} + \Delta E_{\text{Disper}}$ .

(c) The values presented in parentheses indicate the percentage contribution to the overall orbital interactions,  $\Delta E_{\text{Orb}}$

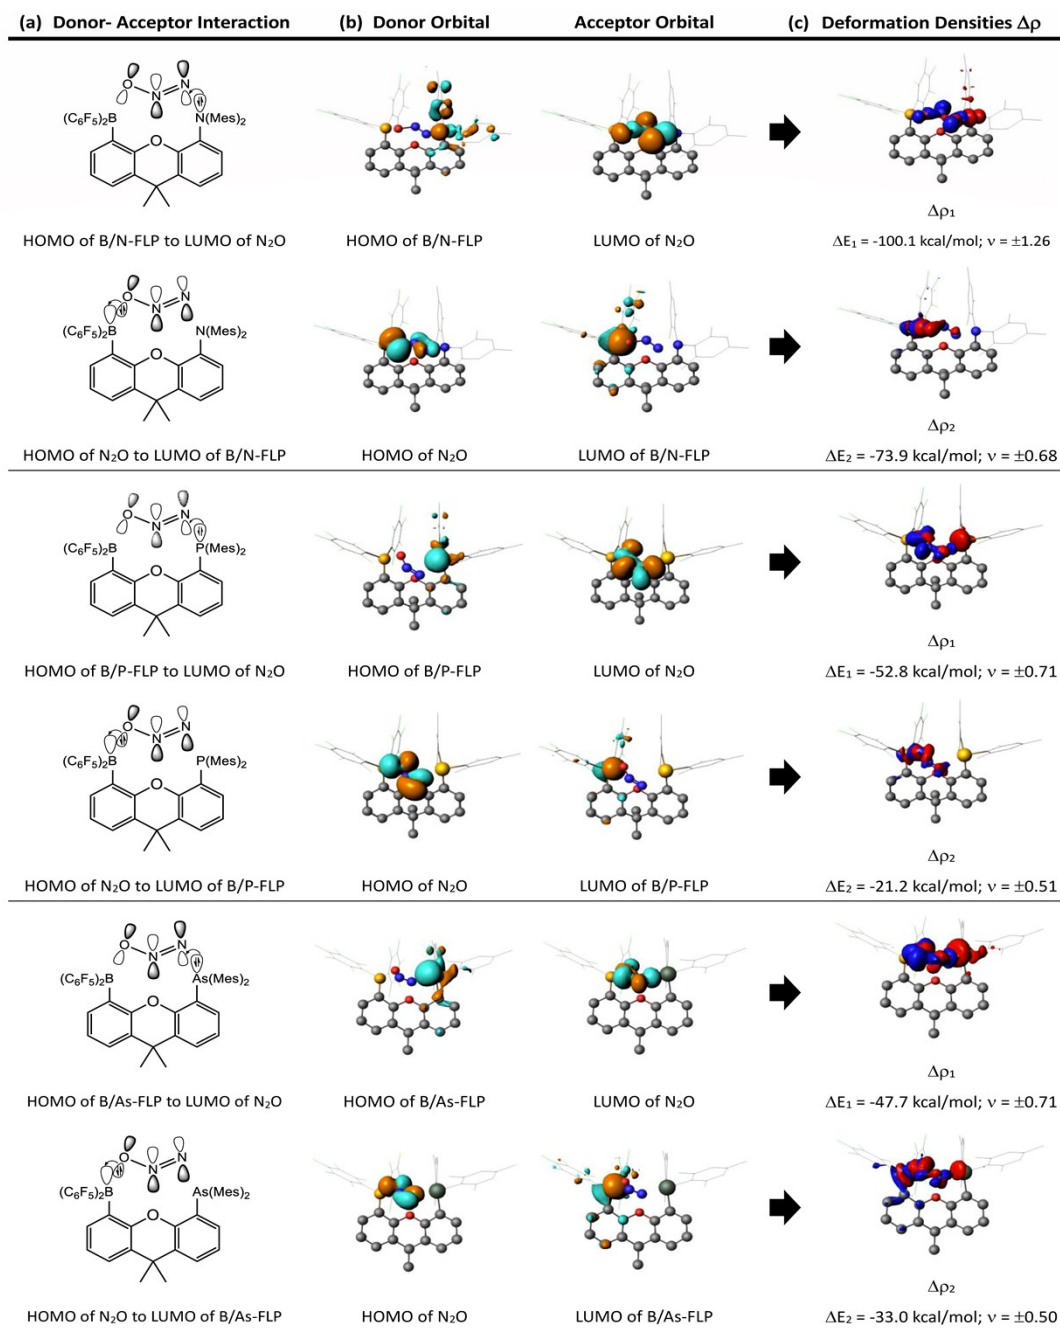

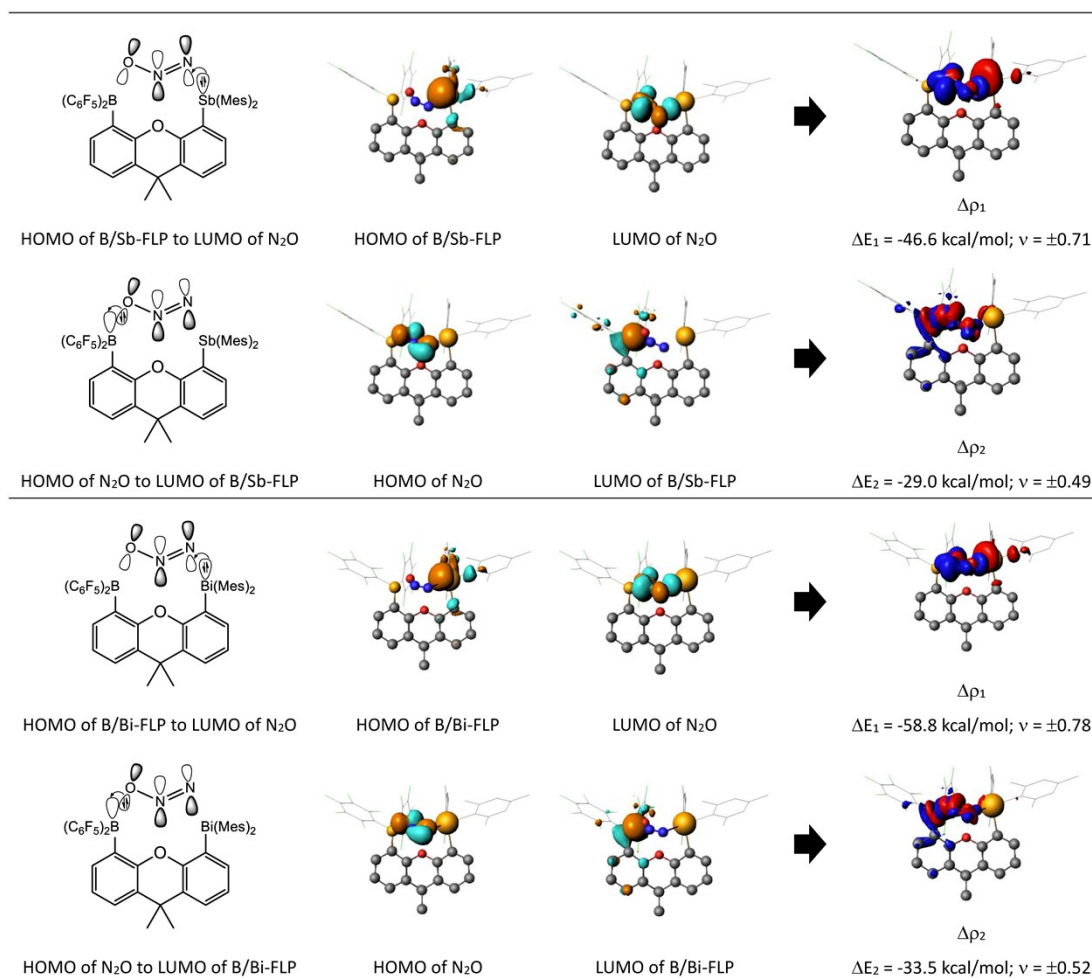

**Figure S1:** The EDA-NOCV analysis of **B/G15-TS** includes the following: (a) A qualitative depiction of the orbital interactions between **B/G15-Rea** and N<sub>2</sub>O. (b) The shape of the most important interaction between the occupied and empty orbitals of **B/G15-Rea** and N<sub>2</sub>O fragments. Hydrogen atoms have been omitted for clarity. (c) A plot showing the deformation densities ( $\Delta\rho_1$  and  $\Delta\rho_2$ ) resulting from the pairwise orbital interactions between the two fragments in their closed-shell state, accompanied by the respective associated interaction energies  $\Delta E_{\text{Orb}(1)}$  and  $\Delta E_{\text{Orb}(2)}$  measured in kcal/mol. The direction of charge flow in the deformation densities is denoted by the color gradient from red to blue.

(All calculations were based on B3LYP-D3(BJ)/def2-TZVP level.)

**Table S2**  
**B/P-Rea**

---

Atomic Coordinates (Angstroms)

| Number | X           | Y          | Z           |
|--------|-------------|------------|-------------|
| P      | 8.03539600  | 2.54702100 | 0.73624900  |
| C      | 6.57933800  | 1.86431400 | -0.17885100 |
| C      | 5.44283400  | 1.30753100 | 0.42739700  |
| C      | 4.30580700  | 1.01220000 | -0.32848300 |
| C      | 4.27603900  | 1.26953900 | -1.70153600 |
| C      | 5.38608800  | 1.83029900 | -2.34503400 |
| C      | 6.50417000  | 2.12034200 | -1.55608000 |
| O      | 7.61099700  | 2.69007500 | -2.13227600 |
| C      | 7.39593300  | 3.56702900 | -3.16831700 |
| C      | 8.26743900  | 4.65886000 | -3.23982100 |
| C      | 8.01788600  | 5.60812300 | -4.24440000 |
| C      | 6.96539900  | 5.43466800 | -5.14599900 |
| C      | 6.11920200  | 4.32713500 | -5.03534100 |
| C      | 6.31802000  | 3.36715300 | -4.03458300 |
| C      | 5.49080300  | 2.09190200 | -3.85191400 |
| C      | 4.11333100  | 2.19886600 | -4.51345200 |
| C      | 6.27389500  | 0.91692300 | -4.49499500 |
| B      | 9.37940200  | 4.85846800 | -2.15934500 |
| C      | 10.50314100 | 3.81551300 | -1.85999300 |
| C      | 11.39127000 | 3.93993600 | -0.77198000 |
| F      | 11.27321900 | 4.94093000 | 0.10269000  |
| C      | 12.42333000 | 3.04180100 | -0.51864100 |
| F      | 13.23506100 | 3.21485400 | 0.52062600  |
| C      | 12.57746900 | 1.92839900 | -1.34263200 |
| F      | 13.55213500 | 1.06140900 | -1.11608900 |
| C      | 11.70066500 | 1.73072400 | -2.40811300 |
| C      | 10.70040900 | 2.66731000 | -2.65582200 |
| F      | 9.92820300  | 2.41799300 | -3.71282000 |
| F      | 11.81607500 | 0.64309800 | -3.16449100 |

|   |             |             |             |
|---|-------------|-------------|-------------|
| C | 9.28664900  | 6.21884500  | -1.36570000 |
| C | 10.32789300 | 7.14409900  | -1.27035800 |
| F | 11.48210700 | 6.90279500  | -1.90308700 |
| C | 10.22244500 | 8.32002100  | -0.53004800 |
| F | 11.23191900 | 9.18377100  | -0.46453400 |
| C | 9.03361600  | 8.58552200  | 0.15725800  |
| F | 8.92070000  | 9.69178900  | 0.88168100  |
| C | 7.96687300  | 7.68761900  | 0.08199600  |
| C | 8.09972400  | 6.53891500  | -0.69831600 |
| F | 7.05281500  | 5.71075000  | -0.75534500 |
| F | 6.84336800  | 7.92812600  | 0.75411100  |
| C | 7.42367400  | 2.41318700  | 2.48321800  |
| C | 7.01328000  | 3.63084400  | 3.08745000  |
| C | 7.01815300  | 4.93964700  | 2.33374300  |
| C | 6.59101200  | 3.62880700  | 4.41991400  |
| C | 6.55681500  | 2.45704400  | 5.18502200  |
| C | 6.10701100  | 2.49136700  | 6.62296100  |
| C | 6.94430700  | 1.26582400  | 4.56919000  |
| C | 7.37373400  | 1.21427700  | 3.23345700  |
| C | 7.75398600  | -0.13760200 | 2.67856700  |
| C | 9.46779800  | 1.36345100  | 0.71570300  |
| C | 9.64886800  | 0.23758000  | -0.12613300 |
| C | 8.66750400  | -0.19213000 | -1.18749000 |
| C | 10.80785800 | -0.54016500 | 0.01251200  |
| C | 11.80192100 | -0.25639100 | 0.95086300  |
| C | 13.02729900 | -1.11961700 | 1.09237000  |
| C | 11.63111500 | 0.88261700  | 1.74063800  |
| C | 10.50680700 | 1.70690400  | 1.62642200  |
| C | 10.46461500 | 2.94458800  | 2.49198400  |
| H | 5.43901000  | 1.12665200  | 1.50188300  |
| H | 3.42955300  | 0.58104400  | 0.16081400  |
| H | 3.37852100  | 1.02901700  | -2.27197600 |
| H | 8.65432000  | 6.49368700  | -4.31853000 |
| H | 6.78990800  | 6.17384800  | -5.93056400 |
| H | 5.29185900  | 4.21643900  | -5.73718100 |
| H | 4.21348200  | 2.37007700  | -5.59469300 |
| H | 3.51982500  | 3.01963900  | -4.08378100 |
| H | 3.55018600  | 1.26242200  | -4.39407900 |

|   |             |             |             |
|---|-------------|-------------|-------------|
| H | 6.38754700  | 1.08282100  | -5.57756500 |
| H | 7.27890900  | 0.82450700  | -4.05949600 |
| H | 5.73873800  | -0.03200400 | -4.33497400 |
| H | 6.64529200  | 5.75761400  | 2.96623800  |
| H | 8.03195000  | 5.20445000  | 1.99414400  |
| H | 6.39412000  | 4.89884100  | 1.43033600  |
| H | 6.27878200  | 4.57345800  | 4.87471000  |
| H | 6.09297900  | 1.48555700  | 7.06758300  |
| H | 6.77593900  | 3.12153100  | 7.23274600  |
| H | 5.09457700  | 2.91836000  | 6.71381300  |
| H | 6.90675400  | 0.33493700  | 5.14239200  |
| H | 7.28681300  | -0.93635000 | 3.27318000  |
| H | 8.84341000  | -0.29302200 | 2.70439000  |
| H | 7.44284800  | -0.26276800 | 1.63443800  |
| H | 9.00282900  | -1.12708100 | -1.65689100 |
| H | 8.58185500  | 0.56596200  | -1.97804600 |
| H | 7.65930800  | -0.35713700 | -0.78436700 |
| H | 10.93360300 | -1.40320200 | -0.64660300 |
| H | 13.02520100 | -1.65766300 | 2.05539300  |
| H | 13.94339800 | -0.50968300 | 1.06018500  |
| H | 13.08878500 | -1.86730500 | 0.28849600  |
| H | 12.41288800 | 1.16314800  | 2.45152400  |
| H | 11.48479600 | 3.24871900  | 2.76471500  |
| H | 9.99118100  | 3.78965800  | 1.97204700  |
| H | 9.89453400  | 2.77710800  | 3.41861900  |

**Table S3**  
**Al/P-Rea**

Atomic Coordinates (Angstroms)

| Number | X          | Y          | Z           |
|--------|------------|------------|-------------|
| P      | 8.16535900 | 2.64918500 | 0.71925900  |
| C      | 6.61860600 | 2.19218600 | -0.17994000 |
| C      | 5.49448800 | 1.64225100 | 0.44717300  |
| C      | 4.34694400 | 1.34238400 | -0.28765500 |
| C      | 4.31661500 | 1.57948300 | -1.65931400 |



|    |             |            |             |
|----|-------------|------------|-------------|
| C  | 5.39876600  | 2.17136600 | -2.33050100 |
| C  | 6.51159200  | 2.50208300 | -1.54710900 |
| O  | 7.60805100  | 3.12003900 | -2.12563600 |
| C  | 7.54567700  | 3.56151600 | -3.46730600 |
| C  | 8.62405300  | 4.39898900 | -3.72595100 |
| C  | 8.71153100  | 4.89464600 | -5.02851500 |
| C  | 7.73667200  | 4.54072900 | -5.97491300 |
| C  | 6.65595900  | 3.72457900 | -5.62570100 |
| C  | 6.51836000  | 3.21021200 | -4.32375900 |
| C  | 5.36290200  | 2.33202400 | -3.85959900 |
| C  | 4.02692300  | 2.96431900 | -4.30191200 |
| C  | 5.51665500  | 0.92831000 | -4.49494600 |
| Al | 9.22837700  | 4.50005700 | -1.85174200 |
| C  | 10.90159400 | 3.62338500 | -1.29970000 |
| C  | 11.72196600 | 4.08907300 | -0.27345700 |
| F  | 11.35813900 | 5.16248100 | 0.44767400  |
| C  | 12.90755400 | 3.45530600 | 0.09529600  |
| F  | 13.63360400 | 3.89144400 | 1.12617400  |
| C  | 13.28581500 | 2.29016700 | -0.57180900 |
| F  | 14.37370900 | 1.62772600 | -0.18632000 |
| C  | 12.49491600 | 1.78458700 | -1.60311600 |
| C  | 11.31918500 | 2.45403900 | -1.93479300 |
| F  | 10.55645500 | 1.91158100 | -2.90013900 |
| F  | 12.83896100 | 0.64529800 | -2.20329800 |
| C  | 8.59697700  | 6.15233800 | -0.97098800 |
| C  | 9.46717200  | 7.23387500 | -0.85480600 |
| F  | 10.71229900 | 7.12981800 | -1.35363300 |
| C  | 9.10986900  | 8.44082100 | -0.25279100 |
| F  | 9.97281100  | 9.44938100 | -0.15091900 |
| C  | 7.80811900  | 8.58724400 | 0.23602400  |
| F  | 7.44023700  | 9.72456500 | 0.81714600  |
| C  | 6.89344700  | 7.53900200 | 0.11030600  |
| C  | 7.30440000  | 6.35594700 | -0.50311700 |
| F  | 6.38975400  | 5.37122400 | -0.60335100 |
| F  | 5.65686200  | 7.67149500 | 0.58990100  |
| C  | 7.61451900  | 2.51126800 | 2.48368000  |
| C  | 7.37730500  | 3.72875300 | 3.17294600  |
| C  | 7.45486600  | 5.06609000 | 2.48154200  |

|   |             |             |             |
|---|-------------|-------------|-------------|
| C | 7.04093700  | 3.69812200  | 4.52896500  |
| C | 6.92232100  | 2.49679100  | 5.23646100  |
| C | 6.57014100  | 2.49849000  | 6.70134800  |
| C | 7.13489400  | 1.30782200  | 4.53721400  |
| C | 7.47742000  | 1.28256300  | 3.17599000  |
| C | 7.67803500  | -0.07631600 | 2.54779000  |
| C | 9.43523000  | 1.30159000  | 0.57124100  |
| C | 9.43688300  | 0.21459600  | -0.33847500 |
| C | 8.34066000  | -0.06375100 | -1.33700400 |
| C | 10.52341400 | -0.67106800 | -0.33753900 |
| C | 11.61403200 | -0.53172900 | 0.52258100  |
| C | 12.80179900 | -1.45317600 | 0.44489700  |
| C | 11.59934900 | 0.54981300  | 1.40495800  |
| C | 10.55006800 | 1.47480100  | 1.43669700  |
| C | 10.67127300 | 2.62270600  | 2.41181800  |
| H | 5.52121000  | 1.44447300  | 1.51778100  |
| H | 3.47962100  | 0.90415900  | 0.21032200  |
| H | 3.42880400  | 1.29882800  | -2.22718200 |
| H | 9.52538500  | 5.56457800  | -5.31945500 |
| H | 7.80776200  | 4.91991700  | -6.99722700 |
| H | 5.90297500  | 3.48788600  | -6.38011500 |
| H | 3.99668600  | 3.08436500  | -5.39403400 |
| H | 3.89234000  | 3.95419000  | -3.84179400 |
| H | 3.17151200  | 2.33258300  | -4.02415400 |
| H | 5.50856100  | 0.99956200  | -5.59345100 |
| H | 6.46695300  | 0.46641800  | -4.18863800 |
| H | 4.69533800  | 0.26487400  | -4.18313300 |
| H | 7.35934200  | 5.88784200  | 3.20506800  |
| H | 8.39794600  | 5.19508000  | 1.93073500  |
| H | 6.64356700  | 5.17159400  | 1.74743200  |
| H | 6.86565600  | 4.64459800  | 5.04825600  |
| H | 6.47173800  | 1.47686100  | 7.09616700  |
| H | 7.34263600  | 3.01755200  | 7.29308400  |
| H | 5.61965800  | 3.02730100  | 6.88148500  |
| H | 7.02903800  | 0.35576100  | 5.06490800  |
| H | 7.13634900  | -0.83997300 | 3.12492000  |
| H | 8.74147300  | -0.35959600 | 2.53194900  |
| H | 7.32585700  | -0.12025500 | 1.51111200  |

|   |             |             |             |
|---|-------------|-------------|-------------|
| H | 8.53821800  | -1.01193900 | -1.85530600 |
| H | 8.29498900  | 0.72178500  | -2.10368900 |
| H | 7.34873800  | -0.13352300 | -0.87166600 |
| H | 10.51683800 | -1.49828700 | -1.05190400 |
| H | 13.21788600 | -1.66240600 | 1.44235800  |
| H | 13.60171500 | -0.98688800 | -0.15359500 |
| H | 12.54294900 | -2.40981600 | -0.03216400 |
| H | 12.45216500 | 0.70660300  | 2.07161900  |
| H | 11.72754400 | 2.81224900  | 2.64778100  |
| H | 10.25099900 | 3.55640700  | 2.01314700  |
| H | 10.14353600 | 2.41289400  | 3.35489900  |

**Table S4**  
**Ga/P-Rea**

Atomic Coordinates (Angstroms)

| Number | X           | Y          | Z           |
|--------|-------------|------------|-------------|
| P      | 8.08422400  | 2.61560300 | 0.62794800  |
| C      | 6.53792200  | 2.07452700 | -0.22668400 |
| C      | 5.38647800  | 1.61956000 | 0.43200800  |
| C      | 4.21560200  | 1.36204000 | -0.28394100 |
| C      | 4.17583700  | 1.54109400 | -1.66865100 |
| C      | 5.29815200  | 2.00442300 | -2.36753000 |
| C      | 6.44138700  | 2.28911400 | -1.61042400 |
| O      | 7.56557800  | 2.77737000 | -2.22355800 |
| C      | 7.40767000  | 3.49591000 | -3.39642400 |
| C      | 8.35729100  | 4.49745600 | -3.57839900 |
| C      | 8.25885200  | 5.26890800 | -4.74128500 |
| C      | 7.22553100  | 5.02689100 | -5.65579500 |
| C      | 6.27087100  | 4.03535300 | -5.40667300 |
| C      | 6.33869300  | 3.23891700 | -4.25373900 |
| C      | 5.37550300  | 2.10460400 | -3.89843000 |
| C      | 3.99311600  | 2.32179700 | -4.52655200 |
| C      | 5.97345500  | 0.77628600 | -4.43123900 |
| Ga     | 9.43859600  | 4.73978500 | -1.94877700 |
| C      | 11.01698800 | 3.66740900 | -1.46879200 |

|   |             |             |             |
|---|-------------|-------------|-------------|
| C | 11.89090100 | 4.02306200  | -0.44050200 |
| F | 11.66797000 | 5.12361700  | 0.28922500  |
| C | 12.99249000 | 3.24589000  | -0.09094200 |
| F | 13.77117400 | 3.57780000  | 0.93910300  |
| C | 13.22206500 | 2.05086500  | -0.77231600 |
| F | 14.23366100 | 1.26938500  | -0.41051100 |
| C | 12.36298700 | 1.64871000  | -1.79434200 |
| C | 11.27544300 | 2.45839500  | -2.11791200 |
| F | 10.45543700 | 2.02378600  | -3.08416100 |
| F | 12.56289800 | 0.48202700  | -2.40427600 |
| C | 8.96253600  | 6.38512000  | -0.94939500 |
| C | 9.85837600  | 7.41519700  | -0.67839500 |
| F | 11.11778100 | 7.34181300  | -1.13293100 |
| C | 9.49317900  | 8.55302500  | 0.04386900  |
| F | 10.36968400 | 9.52241000  | 0.29514400  |
| C | 8.17428400  | 8.67674200  | 0.49165900  |
| F | 7.80792500  | 9.74840900  | 1.18578900  |
| C | 7.24102900  | 7.67570400  | 0.21000400  |
| C | 7.65086700  | 6.56248900  | -0.52218700 |
| F | 6.73319600  | 5.61420400  | -0.78041800 |
| F | 5.99085100  | 7.78568600  | 0.65532500  |
| C | 7.55233500  | 2.50837800  | 2.40437200  |
| C | 7.28438800  | 3.73573100  | 3.06323800  |
| C | 7.33987900  | 5.05578400  | 2.33727800  |
| C | 6.94721200  | 3.73257800  | 4.41947200  |
| C | 6.85850100  | 2.54702800  | 5.15758100  |
| C | 6.51237700  | 2.57705700  | 6.62374400  |
| C | 7.09753500  | 1.34610900  | 4.48776700  |
| C | 7.43900800  | 1.29539800  | 3.12690400  |
| C | 7.65457400  | -0.07180900 | 2.52372800  |
| C | 9.41043400  | 1.31534800  | 0.53689300  |
| C | 9.44445100  | 0.16910800  | -0.30040900 |
| C | 8.36593300  | -0.18872600 | -1.29048800 |
| C | 10.54079400 | -0.69734900 | -0.22320900 |
| C | 11.61703300 | -0.48492200 | 0.64314000  |
| C | 12.79788000 | -1.41880900 | 0.64921300  |
| C | 11.57937100 | 0.65805500  | 1.44084900  |
| C | 10.51514700 | 1.56901800  | 1.39260400  |

|   |             |             |             |
|---|-------------|-------------|-------------|
| C | 10.61110900 | 2.78929200  | 2.27839800  |
| H | 5.40364800  | 1.47877400  | 1.51234100  |
| H | 3.32615200  | 1.00980700  | 0.24288700  |
| H | 3.25805900  | 1.30900600  | -2.20936900 |
| H | 8.96897700  | 6.07758900  | -4.93470900 |
| H | 7.14926100  | 5.63003500  | -6.56349200 |
| H | 5.46229800  | 3.88530100  | -6.12310100 |
| H | 4.06777300  | 2.37108900  | -5.62193000 |
| H | 3.52863600  | 3.25184900  | -4.16661700 |
| H | 3.32065300  | 1.48342200  | -4.29680500 |
| H | 6.07419800  | 0.81533900  | -5.52699600 |
| H | 6.96957400  | 0.59201800  | -4.00421700 |
| H | 5.32352300  | -0.07138700 | -4.16338900 |
| H | 7.11174100  | 5.88835600  | 3.01765600  |
| H | 8.33091300  | 5.23498000  | 1.89384800  |
| H | 6.61498600  | 5.08810400  | 1.51237600  |
| H | 6.74588000  | 4.68734300  | 4.91367000  |
| H | 6.36383200  | 1.56422700  | 7.02611500  |
| H | 7.31477600  | 3.05774600  | 7.20910300  |
| H | 5.59225300  | 3.15645200  | 6.80514200  |
| H | 7.00998800  | 0.40498600  | 5.03810700  |
| H | 7.13921900  | -0.83422900 | 3.12599100  |
| H | 8.72253000  | -0.33546700 | 2.49080000  |
| H | 7.27923200  | -0.14015500 | 1.49607900  |
| H | 8.58588100  | -1.15974600 | -1.75472100 |
| H | 8.31335900  | 0.56009100  | -2.09168500 |
| H | 7.37154100  | -0.25135300 | -0.82896100 |
| H | 10.55453500 | -1.57326700 | -0.87721200 |
| H | 13.45049500 | -1.24132100 | 1.51623900  |
| H | 13.40389900 | -1.27226500 | -0.25985700 |
| H | 12.47770100 | -2.47257400 | 0.66502800  |
| H | 12.42195200 | 0.87590600  | 2.10317700  |
| H | 11.66280200 | 3.01944700  | 2.49861100  |
| H | 10.16885200 | 3.67880200  | 1.80779700  |
| H | 10.08696500 | 2.64062100  | 3.23503100  |

---

**Table S5**

## In/P-Rea

-----  
Atomic Coordinates (Angstroms)

| Number | X           | Y          | Z           |
|--------|-------------|------------|-------------|
| P      | 8.01648100  | 2.47792700 | 0.50914000  |
| C      | 6.60144500  | 1.62711400 | -0.33504900 |
| C      | 5.53283000  | 0.99432400 | 0.32294300  |
| C      | 4.40167200  | 0.59788300 | -0.39283100 |
| C      | 4.28905800  | 0.85483800 | -1.76499900 |
| C      | 5.32452400  | 1.49216500 | -2.45428000 |
| C      | 6.46325600  | 1.83175700 | -1.71225900 |
| O      | 7.49396700  | 2.46050000 | -2.34776600 |
| C      | 7.09372000  | 3.47159800 | -3.21859400 |
| C      | 7.78218800  | 4.66869800 | -3.09190600 |
| C      | 7.36752900  | 5.71667900 | -3.92362500 |
| C      | 6.29675200  | 5.52994000 | -4.80884400 |
| C      | 5.60538900  | 4.31177300 | -4.86077300 |
| C      | 5.99408200  | 3.24107300 | -4.04531000 |
| C      | 5.33016400  | 1.86051900 | -3.94742200 |
| C      | 3.91931400  | 1.85869600 | -4.54074600 |
| C      | 6.20902600  | 0.83380700 | -4.70795600 |
| In     | 9.22308300  | 4.55421100 | -1.45334700 |
| C      | 10.92729300 | 3.19875800 | -1.72895900 |
| C      | 11.98491300 | 3.11435000 | -0.82941700 |
| F      | 12.03421500 | 3.92572700 | 0.23633500  |
| C      | 13.01054100 | 2.17817000 | -0.95445900 |
| F      | 13.98877000 | 2.10210700 | -0.05098800 |
| C      | 12.97255400 | 1.26758500 | -2.00944700 |
| F      | 13.91071200 | 0.32685800 | -2.10815100 |
| C      | 11.93207100 | 1.32000000 | -2.93718100 |
| C      | 10.93859400 | 2.28918200 | -2.78443400 |
| F      | 9.95793400  | 2.29150200 | -3.70271400 |
| F      | 11.88477600 | 0.43505700 | -3.93350900 |
| C      | 9.39597600  | 6.49394100 | -0.42077200 |
| C      | 10.59395800 | 7.09825200 | -0.04802100 |
| F      | 11.76469000 | 6.49611000 | -0.28838200 |
| C      | 10.64210600 | 8.35047300 | 0.57244800  |

|   |             |             |             |
|---|-------------|-------------|-------------|
| F | 11.80296600 | 8.89888000  | 0.92640500  |
| C | 9.45124600  | 9.04369700  | 0.80160100  |
| F | 9.47808700  | 10.23659100 | 1.38632000  |
| C | 8.23148200  | 8.48181500  | 0.41562700  |
| C | 8.23482500  | 7.23205900  | -0.20479700 |
| F | 7.04244800  | 6.73778000  | -0.58409900 |
| F | 7.09592000  | 9.14474200  | 0.63109800  |
| C | 7.34205500  | 2.54503000  | 2.23364000  |
| C | 6.79259800  | 3.77394200  | 2.67274000  |
| C | 6.75215800  | 4.98283300  | 1.77821400  |
| C | 6.28764200  | 3.87730800  | 3.97138700  |
| C | 6.30217000  | 2.79556000  | 4.85863400  |
| C | 5.77101200  | 2.94216100  | 6.26065200  |
| C | 6.82115800  | 1.58430800  | 4.39764300  |
| C | 7.33947600  | 1.42595600  | 3.10277700  |
| C | 7.85504100  | 0.05293000  | 2.73772400  |
| C | 9.52000300  | 1.41462800  | 0.68069500  |
| C | 9.81463500  | 0.27893900  | -0.11455700 |
| C | 8.92898600  | -0.21974900 | -1.22833200 |
| C | 11.00433200 | -0.41698300 | 0.12268600  |
| C | 11.92585500 | -0.03006900 | 1.10121400  |
| C | 13.22287700 | -0.77511200 | 1.27014200  |
| C | 11.63501300 | 1.11411200  | 1.84289300  |
| C | 10.46358300 | 1.85637100  | 1.64294600  |
| C | 10.29417300 | 3.11281600  | 2.46529000  |
| H | 5.56441100  | 0.84358600  | 1.40055300  |
| H | 3.58072700  | 0.10553400  | 0.13286400  |
| H | 3.37939800  | 0.56283300  | -2.29110200 |
| H | 7.85627100  | 6.69358100  | -3.87169100 |
| H | 5.97645800  | 6.35309500  | -5.45232900 |
| H | 4.75357000  | 4.20856400  | -5.53463900 |
| H | 3.95004500  | 2.12971500  | -5.60584200 |
| H | 3.25922200  | 2.56966200  | -4.02168500 |
| H | 3.47010200  | 0.85666100  | -4.47901100 |
| H | 6.24428400  | 1.08866100  | -5.77827200 |
| H | 7.23981000  | 0.83161200  | -4.32669900 |
| H | 5.79389800  | -0.18045000 | -4.59999500 |
| H | 6.20481700  | 5.81055700  | 2.24999200  |

|   |             |             |             |
|---|-------------|-------------|-------------|
| H | 7.76916600  | 5.33895000  | 1.55771500  |
| H | 6.27204200  | 4.77249500  | 0.81241600  |
| H | 5.86825400  | 4.83327000  | 4.29724900  |
| H | 5.71582500  | 1.97298500  | 6.77714000  |
| H | 6.41790600  | 3.60585600  | 6.85899700  |
| H | 4.76422600  | 3.38990600  | 6.26135100  |
| H | 6.81927800  | 0.71829300  | 5.06538100  |
| H | 7.38401600  | -0.70523500 | 3.38013200  |
| H | 8.94431400  | -0.01905800 | 2.87698500  |
| H | 7.65492000  | -0.21512000 | 1.69404800  |
| H | 9.39418600  | -1.08461400 | -1.72076800 |
| H | 8.77398000  | 0.55285100  | -1.99322700 |
| H | 7.93767900  | -0.52983700 | -0.86777200 |
| H | 11.22875400 | -1.28705600 | -0.50062400 |
| H | 13.75285200 | -0.46419400 | 2.18177000  |
| H | 13.88784500 | -0.57943000 | 0.41328900  |
| H | 13.05916800 | -1.86337400 | 1.31636100  |
| H | 12.35906900 | 1.47198900  | 2.57902700  |
| H | 11.27749400 | 3.48502800  | 2.78149200  |
| H | 9.80870300  | 3.92040500  | 1.89827000  |
| H | 9.68450700  | 2.93834100  | 3.36426200  |

**Table S6**  
**TI/P-Rea**

Atomic Coordinates (Angstroms)

| Number | X          | Y          | Z           |
|--------|------------|------------|-------------|
| P      | 8.05907500 | 2.55053400 | 0.52094600  |
| C      | 6.49345000 | 1.97752700 | -0.27685800 |
| C      | 5.34661600 | 1.56560200 | 0.41915600  |
| C      | 4.15509900 | 1.31908100 | -0.26664300 |
| C      | 4.08137900 | 1.47858500 | -1.65388100 |
| C      | 5.19932900 | 1.89548700 | -2.38615700 |
| C      | 6.37124200 | 2.14606600 | -1.66307400 |
| O      | 7.49091900 | 2.57897500 | -2.31938200 |
| C      | 7.29144800 | 3.39926000 | -3.41547900 |



|    |             |             |             |
|----|-------------|-------------|-------------|
| C  | 8.19852900  | 4.44110200  | -3.55771200 |
| C  | 8.03608100  | 5.30631500  | -4.64146200 |
| C  | 6.96754500  | 5.11228500  | -5.52811700 |
| C  | 6.04553200  | 4.08020000  | -5.32253700 |
| C  | 6.18743600  | 3.19364000  | -4.24583300 |
| C  | 5.25626600  | 2.02201800  | -3.91615000 |
| C  | 3.86363800  | 2.21366800  | -4.52599300 |
| C  | 5.88532700  | 0.72208400  | -4.48159600 |
| TI | 9.49260500  | 4.65539600  | -1.76357600 |
| C  | 11.31024400 | 3.47411300  | -1.32938800 |
| C  | 12.24533400 | 3.85399300  | -0.37466300 |
| F  | 12.07574300 | 4.97558500  | 0.33659400  |
| C  | 13.35858300 | 3.06717800  | -0.07893700 |
| F  | 14.20487300 | 3.41144100  | 0.89207100  |
| C  | 13.54093600 | 1.86553400  | -0.76329700 |
| F  | 14.56859500 | 1.07839900  | -0.45664000 |
| C  | 12.61463000 | 1.45517700  | -1.72280300 |
| C  | 11.50824900 | 2.26246500  | -1.98411100 |
| F  | 10.61686500 | 1.82420600  | -2.88384900 |
| F  | 12.77161400 | 0.27934200  | -2.33022300 |
| C  | 8.97840000  | 6.58464400  | -0.74148200 |
| C  | 9.90436200  | 7.54527200  | -0.35667200 |
| F  | 11.20734000 | 7.37758200  | -0.61955300 |
| C  | 9.52131900  | 8.71840900  | 0.30059400  |
| F  | 10.42136600 | 9.62819500  | 0.66865000  |
| C  | 8.16606600  | 8.94106700  | 0.56052400  |
| F  | 7.78456800  | 10.04911100 | 1.18772500  |
| C  | 7.21072800  | 8.00139800  | 0.16228500  |
| C  | 7.63750100  | 6.84998400  | -0.49867800 |
| F  | 6.69809100  | 5.95885500  | -0.86622800 |
| F  | 5.92171000  | 8.21123900  | 0.42489000  |
| C  | 7.55734300  | 2.53610000  | 2.30793800  |
| C  | 7.30219900  | 3.78919700  | 2.91977700  |
| C  | 7.37127900  | 5.07922500  | 2.14532000  |
| C  | 6.97722800  | 3.84034800  | 4.27796500  |
| C  | 6.88907200  | 2.68491900  | 5.06228700  |
| C  | 6.55467900  | 2.77373200  | 6.52862000  |
| C  | 7.11590700  | 1.45758800  | 4.43753000  |

|   |             |             |             |
|---|-------------|-------------|-------------|
| C | 7.44468300  | 1.35158900  | 3.07685700  |
| C | 7.64884900  | -0.04003400 | 2.52752800  |
| C | 9.39320000  | 1.25986000  | 0.47482000  |
| C | 9.42310700  | 0.08635800  | -0.32142300 |
| C | 8.33633200  | -0.31080800 | -1.28702100 |
| C | 10.52405200 | -0.77301900 | -0.22196800 |
| C | 11.60491800 | -0.52632400 | 0.62834000  |
| C | 12.79057100 | -1.45357300 | 0.66194100  |
| C | 11.57059000 | 0.64619100  | 1.38308200  |
| C | 10.50324400 | 1.55044300  | 1.31276600  |
| C | 10.60200400 | 2.79778700  | 2.15951800  |
| H | 5.38010000  | 1.45736600  | 1.50281500  |
| H | 3.27017100  | 1.00086100  | 0.28867200  |
| H | 3.14087700  | 1.27214300  | -2.16554700 |
| H | 8.71545200  | 6.14957300  | -4.79192200 |
| H | 6.83685400  | 5.78904600  | -6.37591100 |
| H | 5.20527600  | 3.97312400  | -6.00950800 |
| H | 3.92660400  | 2.28341600  | -5.62117400 |
| H | 3.37774400  | 3.12484500  | -4.14649000 |
| H | 3.21666700  | 1.35356900  | -4.30196500 |
| H | 5.97645800  | 0.78841200  | -5.57677000 |
| H | 6.88886000  | 0.55317500  | -4.06591900 |
| H | 5.25845600  | -0.14739500 | -4.22926800 |
| H | 7.09341600  | 5.93280100  | 2.77966500  |
| H | 8.38321700  | 5.26337800  | 1.75410500  |
| H | 6.69662100  | 5.06824700  | 1.27879700  |
| H | 6.78568900  | 4.81478300  | 4.73621100  |
| H | 6.42353100  | 1.77769200  | 6.97586100  |
| H | 7.35453300  | 3.29084200  | 7.08509400  |
| H | 5.62798000  | 3.34760500  | 6.69230700  |
| H | 7.02866000  | 0.53907100  | 5.02470600  |
| H | 7.13507100  | -0.77428900 | 3.16496600  |
| H | 8.71529300  | -0.30982800 | 2.49711600  |
| H | 7.26458600  | -0.15002500 | 1.50685700  |
| H | 8.55828800  | -1.29505000 | -1.72135100 |
| H | 8.26808700  | 0.41150200  | -2.11107600 |
| H | 7.34813200  | -0.36670800 | -0.81099400 |
| H | 10.53545800 | -1.67236700 | -0.84328700 |

|   |             |             |             |
|---|-------------|-------------|-------------|
| H | 12.47629400 | -2.50884500 | 0.66109300  |
| H | 13.41723500 | -1.27800500 | 1.54830700  |
| H | 13.42219800 | -1.29765200 | -0.22759300 |
| H | 12.41629800 | 0.88811300  | 2.03302700  |
| H | 11.65396300 | 3.02793700  | 2.37790200  |
| H | 10.17160200 | 3.67715000  | 1.66002400  |
| H | 10.07296100 | 2.68310000  | 3.11781000  |

**Table S7**  
**B/N-Rea**

Atomic Coordinates (Angstroms)

| Number | X           | Y          | Z           |
|--------|-------------|------------|-------------|
| N      | 7.40872000  | 1.53764700 | 0.99649400  |
| C      | 6.38050400  | 1.34949200 | 0.05343800  |
| C      | 5.19643000  | 0.69393000 | 0.42675500  |
| C      | 4.15266400  | 0.53033900 | -0.47736300 |
| C      | 4.27892900  | 0.99790400 | -1.78760500 |
| C      | 5.44468400  | 1.65586800 | -2.19347800 |
| C      | 6.47217600  | 1.84964800 | -1.25837700 |
| O      | 7.58772800  | 2.59163700 | -1.58795000 |
| C      | 7.43149000  | 3.58860300 | -2.51810500 |
| C      | 8.31115500  | 4.68557700 | -2.44866000 |
| C      | 8.03839300  | 5.77560600 | -3.30178200 |
| C      | 6.99797500  | 5.73652100 | -4.22813200 |
| C      | 6.20693900  | 4.59134500 | -4.32523700 |
| C      | 6.41878200  | 3.49336600 | -3.48255100 |
| C      | 5.69283700  | 2.15674000 | -3.61300200 |
| C      | 4.40175200  | 2.26960000 | -4.42836500 |
| C      | 6.64777200  | 1.15811100 | -4.32086500 |
| B      | 9.64421500  | 4.77112000 | -1.65280600 |
| C      | 10.76710400 | 3.68031000 | -1.71001500 |
| C      | 11.93120300 | 3.75848500 | -0.92002700 |
| F      | 12.02963800 | 4.65300400 | 0.06686600  |
| C      | 13.02929300 | 2.92290600 | -1.08452400 |
| F      | 14.08783900 | 3.02755400 | -0.28318000 |

|   |             |             |             |
|---|-------------|-------------|-------------|
| C | 12.98094500 | 1.91225400  | -2.04330500 |
| F | 14.00561200 | 1.08622300  | -2.19365100 |
| C | 11.83502600 | 1.75223600  | -2.81915400 |
| C | 10.76335600 | 2.62818800  | -2.64811700 |
| F | 9.73578400  | 2.43785800  | -3.47304300 |
| F | 11.77446000 | 0.77462000  | -3.71773100 |
| C | 9.92937600  | 6.16413000  | -0.95719200 |
| C | 11.04797300 | 6.94983200  | -1.25088700 |
| F | 11.95571800 | 6.50954900  | -2.13061500 |
| C | 11.26619400 | 8.19859400  | -0.67169000 |
| F | 12.33780300 | 8.92131300  | -0.98357600 |
| C | 10.33379800 | 8.69525600  | 0.24403800  |
| F | 10.52641300 | 9.88006400  | 0.80858000  |
| C | 9.20152300  | 7.94371900  | 0.56532700  |
| C | 9.01332000  | 6.70583400  | -0.05090700 |
| F | 7.91421700  | 6.01872900  | 0.27949400  |
| F | 8.31678900  | 8.41422900  | 1.43906800  |
| C | 7.01060700  | 1.86434100  | 2.33182900  |
| C | 6.25182900  | 3.03775100  | 2.55151700  |
| C | 5.83216800  | 3.93218000  | 1.41531700  |
| C | 5.88972700  | 3.37049900  | 3.86064500  |
| C | 6.26185800  | 2.58845600  | 4.95937200  |
| C | 5.90446900  | 2.99669700  | 6.36596200  |
| C | 6.99707600  | 1.42485000  | 4.71029300  |
| C | 7.36955900  | 1.03477400  | 3.41777200  |
| C | 8.11379200  | -0.26247400 | 3.22868600  |
| C | 8.76744000  | 1.20692000  | 0.73046000  |
| C | 9.11866100  | 0.01777500  | 0.04275400  |
| C | 8.10368000  | -0.93099500 | -0.54444800 |
| C | 10.47023700 | -0.33455900 | -0.04315400 |
| C | 11.48575900 | 0.41452500  | 0.55868700  |
| C | 12.91384700 | -0.06767000 | 0.55373600  |
| C | 11.11637700 | 1.60666400  | 1.18684900  |
| C | 9.78665400  | 2.03918500  | 1.25167300  |
| C | 9.49249800  | 3.38526500  | 1.86160000  |
| H | 5.11323700  | 0.32060100  | 1.44807000  |
| H | 3.23902600  | 0.01958100  | -0.16563200 |
| H | 3.46350000  | 0.84708300  | -2.49374200 |

|   |             |             |             |
|---|-------------|-------------|-------------|
| H | 8.67772100  | 6.65959200  | -3.25223100 |
| H | 6.81226800  | 6.58909800  | -4.88449700 |
| H | 5.41486600  | 4.55204200  | -5.07320700 |
| H | 4.61677600  | 2.61570300  | -5.44927500 |
| H | 3.68613100  | 2.96618600  | -3.96665900 |
| H | 3.91781500  | 1.28764300  | -4.52472000 |
| H | 6.88044600  | 1.50894600  | -5.33840800 |
| H | 7.59546000  | 1.05595800  | -3.77426600 |
| H | 6.17519000  | 0.16574100  | -4.38675200 |
| H | 5.62401700  | 4.94936100  | 1.77561500  |
| H | 6.60592400  | 3.99446400  | 0.64100100  |
| H | 4.92268600  | 3.55155700  | 0.92191100  |
| H | 5.31014900  | 4.28348800  | 4.02514000  |
| H | 5.74193200  | 2.11948400  | 7.01190200  |
| H | 6.71408400  | 3.59243400  | 6.82447300  |
| H | 4.99276800  | 3.61345400  | 6.38869300  |
| H | 7.27716000  | 0.78075100  | 5.54906000  |
| H | 8.03261200  | -0.88427000 | 4.13172700  |
| H | 9.18317100  | -0.10149300 | 3.02123900  |
| H | 7.71374600  | -0.83515100 | 2.38020700  |
| H | 8.58824900  | -1.87791400 | -0.82099900 |
| H | 7.61988900  | -0.52467200 | -1.44594200 |
| H | 7.29327800  | -1.15574800 | 0.16311600  |
| H | 10.73076000 | -1.26154100 | -0.56203500 |
| H | 13.09378900 | -0.76711000 | 1.38870900  |
| H | 13.62697200 | 0.76095400  | 0.66604900  |
| H | 13.15827800 | -0.60291700 | -0.37555700 |
| H | 11.89130200 | 2.24390800  | 1.62186200  |
| H | 10.39471800 | 4.01107100  | 1.84538400  |
| H | 8.70106900  | 3.90797100  | 1.30997700  |
| H | 9.14877100  | 3.30979700  | 2.90496900  |

**Table S8**  
**B/As-Rea**

Atomic Coordinates (Angstroms)

| Number | X | Y | Z |
|--------|---|---|---|
|--------|---|---|---|

---

|    |             |            |             |
|----|-------------|------------|-------------|
| As | 8.11259600  | 2.67245900 | 0.71069400  |
| C  | 6.55611700  | 1.89119800 | -0.22226600 |
| C  | 5.42261000  | 1.35097100 | 0.39782600  |
| C  | 4.28387300  | 1.04696100 | -0.35504000 |
| C  | 4.25320600  | 1.28577600 | -1.73208400 |
| C  | 5.36540000  | 1.83059000 | -2.38619100 |
| C  | 6.48489200  | 2.12100000 | -1.60009600 |
| O  | 7.59770100  | 2.67591500 | -2.18561800 |
| C  | 7.38287500  | 3.55667500 | -3.21746900 |
| C  | 8.24950400  | 4.65305600 | -3.28181300 |
| C  | 7.99611000  | 5.60500700 | -4.28354200 |
| C  | 6.94534500  | 5.42956100 | -5.18661200 |
| C  | 6.10150800  | 4.31930300 | -5.07951000 |
| C  | 6.30314100  | 3.35680200 | -4.08210300 |
| C  | 5.47382500  | 2.08223800 | -3.89480400 |
| C  | 4.09799800  | 2.18716300 | -4.55959000 |
| C  | 6.25746800  | 0.90263000 | -4.52852700 |
| B  | 9.35204800  | 4.85805700 | -2.19211300 |
| C  | 10.48534600 | 3.82745300 | -1.88110700 |
| C  | 11.35774900 | 3.96183600 | -0.78136400 |
| F  | 11.21152500 | 4.95772500 | 0.09550000  |
| C  | 12.39716000 | 3.07645500 | -0.51367000 |
| F  | 13.19212300 | 3.26019800 | 0.53588700  |
| C  | 12.57962500 | 1.96880400 | -1.33992300 |
| F  | 13.56559000 | 1.11758700 | -1.10393000 |
| C  | 11.71869800 | 1.76040700 | -2.41657300 |
| C  | 10.70799500 | 2.68323800 | -2.67568200 |
| F  | 9.94911100  | 2.42494500 | -3.73991200 |
| F  | 11.85992000 | 0.67655000 | -3.17379100 |
| C  | 9.24084000  | 6.21406900 | -1.39200300 |
| C  | 10.26787500 | 7.15562400 | -1.30895600 |
| F  | 11.41822900 | 6.93113800 | -1.95561500 |
| C  | 10.15357700 | 8.32874600 | -0.56553700 |
| F  | 11.14978800 | 9.20841600 | -0.51207300 |
| C  | 8.97005800  | 8.57353000 | 0.13827700  |
| F  | 8.84809800  | 9.67719100 | 0.86524000  |
| C  | 7.91784500  | 7.65745900 | 0.07698200  |

|   |             |             |             |
|---|-------------|-------------|-------------|
| C | 8.05950400  | 6.51117100  | -0.70537600 |
| F | 7.02749500  | 5.66169700  | -0.74423200 |
| F | 6.80015200  | 7.87906700  | 0.76516300  |
| C | 7.42801400  | 2.48051200  | 2.55849200  |
| C | 7.03776000  | 3.68796200  | 3.19021500  |
| C | 7.09519000  | 5.02246700  | 2.48159800  |
| C | 6.58302600  | 3.65331700  | 4.51220200  |
| C | 6.49710300  | 2.45717800  | 5.23472600  |
| C | 5.99744900  | 2.45355400  | 6.65680800  |
| C | 6.87239400  | 1.27768400  | 4.58972100  |
| C | 7.33642200  | 1.26013300  | 3.26372000  |
| C | 7.71513400  | -0.07858200 | 2.67641200  |
| C | 9.59048600  | 1.34632000  | 0.73273300  |
| C | 9.74678100  | 0.23080700  | -0.12637200 |
| C | 8.75925200  | -0.14302600 | -1.20210300 |
| C | 10.88089400 | -0.57897100 | 0.01031300  |
| C | 11.87587200 | -0.32997200 | 0.96174700  |
| C | 13.08293400 | -1.22416000 | 1.06452800  |
| C | 11.72391900 | 0.79448200  | 1.77219400  |
| C | 10.61364400 | 1.64506800  | 1.66579700  |
| C | 10.57433400 | 2.85570900  | 2.56939600  |
| H | 5.41810200  | 1.19036100  | 1.47621600  |
| H | 3.40541600  | 0.62729800  | 0.14042700  |
| H | 3.35234600  | 1.04377400  | -2.29690800 |
| H | 8.62760500  | 6.49441600  | -4.35372800 |
| H | 6.76766200  | 6.17067500  | -5.96885800 |
| H | 5.27348300  | 4.20974300  | -5.78078000 |
| H | 4.20009000  | 2.34991900  | -5.64204200 |
| H | 3.50538600  | 3.01229500  | -4.13706800 |
| H | 3.53288700  | 1.25277000  | -4.43316100 |
| H | 6.37643300  | 1.06267100  | -5.61143300 |
| H | 7.25995700  | 0.80995900  | -4.08713900 |
| H | 5.71923700  | -0.04415600 | -4.36627900 |
| H | 6.72174200  | 5.82697800  | 3.13064500  |
| H | 8.12450900  | 5.27991500  | 2.18359600  |
| H | 6.49412900  | 5.02944200  | 1.56116100  |
| H | 6.28483700  | 4.59021300  | 4.99211300  |
| H | 6.05842900  | 1.44749400  | 7.10463400  |

|   |             |             |             |
|---|-------------|-------------|-------------|
| H | 6.58484400  | 3.14656700  | 7.28784100  |
| H | 4.94298200  | 2.78596500  | 6.70843000  |
| H | 6.80101200  | 0.32995500  | 5.13143000  |
| H | 7.21766600  | -0.89064700 | 3.22685000  |
| H | 8.80096200  | -0.24978000 | 2.73409300  |
| H | 7.43970100  | -0.16400800 | 1.61839700  |
| H | 9.07851900  | -1.06305400 | -1.71084900 |
| H | 8.67830600  | 0.64821300  | -1.95959200 |
| H | 7.75045200  | -0.30913000 | -0.79961500 |
| H | 10.99069200 | -1.43664900 | -0.65942700 |
| H | 13.72163500 | -0.94459400 | 1.91484400  |
| H | 13.69271600 | -1.15892600 | 0.14888700  |
| H | 12.79004800 | -2.27934000 | 1.18786300  |
| H | 12.50204100 | 1.03866400  | 2.50007000  |
| H | 11.58205700 | 3.08650600  | 2.94123500  |
| H | 10.20468400 | 3.74909500  | 2.04438700  |
| H | 9.91482500  | 2.69642600  | 3.43608700  |

**Table S9**  
**B/Sb-Rea**

Atomic Coordinates (Angstroms)

| Number | X          | Y          | Z           |
|--------|------------|------------|-------------|
| Sb     | 8.19101300 | 2.83108600 | 0.71779400  |
| C      | 6.48291000 | 1.88647500 | -0.25979100 |
| C      | 5.34971100 | 1.35095800 | 0.36244900  |
| C      | 4.22056000 | 1.02497100 | -0.39831200 |
| C      | 4.20019200 | 1.24555700 | -1.77964600 |
| C      | 5.31571500 | 1.78480500 | -2.43376400 |
| C      | 6.42688700 | 2.08187500 | -1.63996000 |
| O      | 7.54787400 | 2.63471400 | -2.22493200 |
| C      | 7.32934900 | 3.53238400 | -3.24081200 |
| C      | 8.18399500 | 4.64030800 | -3.28862300 |
| C      | 7.91143900 | 5.60702100 | -4.27279700 |
| C      | 6.85986500 | 5.43484100 | -5.17482400 |
| C      | 6.03197600 | 4.31080000 | -5.08643700 |



|   |             |            |             |
|---|-------------|------------|-------------|
| C | 6.24982400  | 3.33342900 | -4.10756600 |
| C | 5.43607100  | 2.04446700 | -3.93977100 |
| C | 4.06585000  | 2.13424800 | -4.61748800 |
| C | 6.24363300  | 0.88110500 | -4.57332200 |
| B | 9.31773100  | 4.84911900 | -2.23258100 |
| C | 10.46475400 | 3.81892600 | -1.95352800 |
| C | 11.36389300 | 3.94936900 | -0.87419500 |
| F | 11.22722200 | 4.93579800 | 0.01654000  |
| C | 12.40855000 | 3.06385200 | -0.62997200 |
| F | 13.22075000 | 3.24290500 | 0.40646500  |
| C | 12.58023200 | 1.96454300 | -1.47024800 |
| F | 13.57383900 | 1.11511600 | -1.26295800 |
| C | 11.69824200 | 1.76242000 | -2.53080900 |
| C | 10.67694100 | 2.68226700 | -2.76120800 |
| F | 9.89609400  | 2.42736000 | -3.81015900 |
| F | 11.82899600 | 0.68725100 | -3.30168400 |
| C | 9.25343600  | 6.21949900 | -1.44968500 |
| C | 10.30668800 | 7.13532600 | -1.40923900 |
| F | 11.43040100 | 6.87372200 | -2.08799500 |
| C | 10.24888000 | 8.31788400 | -0.67428500 |
| F | 11.26943300 | 9.17050700 | -0.66307200 |
| C | 9.09632100  | 8.60173000 | 0.06516000  |
| F | 9.02799900  | 9.71466200 | 0.78451500  |
| C | 8.01964400  | 7.71261900 | 0.04880500  |
| C | 8.10303900  | 6.55776700 | -0.72928600 |
| F | 7.04416500  | 5.73980700 | -0.72163000 |
| F | 6.93188000  | 7.96845700 | 0.77224100  |
| C | 7.37612600  | 2.58247600 | 2.73395800  |
| C | 6.95590500  | 3.77033200 | 3.38071700  |
| C | 7.07189500  | 5.13078600 | 2.72591100  |
| C | 6.41344000  | 3.69348600 | 4.66833600  |
| C | 6.27173800  | 2.47257400 | 5.33936600  |
| C | 5.68743900  | 2.42415000 | 6.72819000  |
| C | 6.68694500  | 1.31284100 | 4.68215200  |
| C | 7.23985500  | 1.34083500 | 3.39058600  |
| C | 7.67558800  | 0.03083000 | 2.77888000  |
| C | 9.77957400  | 1.31462400 | 0.76792400  |
| C | 9.90644700  | 0.21660500 | -0.11304300 |

|   |             |             |             |
|---|-------------|-------------|-------------|
| C | 8.88615600  | -0.11363600 | -1.17250600 |
| C | 11.03376900 | -0.61033100 | -0.01282900 |
| C | 12.04559000 | -0.38742000 | 0.92671200  |
| C | 13.26264600 | -1.27265500 | 0.97764900  |
| C | 11.91127200 | 0.71253600  | 1.77623800  |
| C | 10.80566400 | 1.57185700  | 1.70703900  |
| C | 10.76323600 | 2.75538000  | 2.64592900  |
| H | 5.33496600  | 1.21263300  | 1.44523600  |
| H | 3.33859800  | 0.60816300  | 0.09374000  |
| H | 3.30298800  | 0.99562100  | -2.34716500 |
| H | 8.53200500  | 6.50489800  | -4.33065100 |
| H | 6.66948900  | 6.18816800  | -5.94225600 |
| H | 5.20355100  | 4.20255800  | -5.78745600 |
| H | 4.17572200  | 2.30339600  | -5.69829300 |
| H | 3.45762900  | 2.94891000  | -4.19678300 |
| H | 3.51277100  | 1.19149500  | -4.49960500 |
| H | 6.37045700  | 1.04996000  | -5.65401700 |
| H | 7.24294100  | 0.80019100  | -4.12250800 |
| H | 5.71756700  | -0.07434900 | -4.42265600 |
| H | 6.66548900  | 5.91720500  | 3.37748000  |
| H | 8.12184400  | 5.38926400  | 2.50926600  |
| H | 6.53038300  | 5.18458900  | 1.76886600  |
| H | 6.08746900  | 4.61441700  | 5.16135500  |
| H | 5.58584500  | 1.39024000  | 7.08893800  |
| H | 6.32225400  | 2.97086000  | 7.44560200  |
| H | 4.69106500  | 2.89492500  | 6.75896400  |
| H | 6.57840400  | 0.34800300  | 5.18643400  |
| H | 7.20495000  | -0.81609500 | 3.29919000  |
| H | 8.76693000  | -0.09692300 | 2.84544700  |
| H | 7.41916800  | -0.03733300 | 1.71352100  |
| H | 9.17753600  | -1.01884900 | -1.72320700 |
| H | 8.78340600  | 0.70292800  | -1.90034500 |
| H | 7.88901000  | -0.28243200 | -0.74111200 |
| H | 11.12485900 | -1.45592600 | -0.70067100 |
| H | 13.76574200 | -1.21376400 | 1.95419500  |
| H | 13.99135100 | -0.96627300 | 0.20840700  |
| H | 13.00466900 | -2.32526900 | 0.78412300  |
| H | 12.69700600 | 0.92354800  | 2.50675900  |

|   |             |            |            |
|---|-------------|------------|------------|
| H | 11.70395100 | 2.84352400 | 3.20645900 |
| H | 10.62201100 | 3.70212000 | 2.09950200 |
| H | 9.93922000  | 2.67255600 | 3.37154700 |

**Table S10**  
**B/Bi-Rea**

Atomic Coordinates (Angstroms)

| Number | X           | Y          | Z           |
|--------|-------------|------------|-------------|
| Bi     | 8.22316400  | 2.91964800 | 0.75425600  |
| C      | 6.43914600  | 1.90767900 | -0.26273300 |
| C      | 5.30878600  | 1.35981900 | 0.34984200  |
| C      | 4.19181000  | 1.01802300 | -0.42378500 |
| C      | 4.18597400  | 1.23462800 | -1.80588100 |
| C      | 5.30286500  | 1.78516400 | -2.44929900 |
| C      | 6.40000200  | 2.09900600 | -1.64219500 |
| O      | 7.52461200  | 2.66662000 | -2.21457400 |
| C      | 7.31667300  | 3.54108800 | -3.25063800 |
| C      | 8.17567300  | 4.64618700 | -3.31556400 |
| C      | 7.90986900  | 5.59843700 | -4.31580800 |
| C      | 6.86338600  | 5.41349000 | -5.22085900 |
| C      | 6.03659600  | 4.28955500 | -5.12128700 |
| C      | 6.24634500  | 3.32709200 | -4.12596300 |
| C      | 5.43782000  | 2.03539400 | -3.95536700 |
| C      | 4.07467800  | 2.11114800 | -4.64909100 |
| C      | 6.26005500  | 0.87268000 | -4.57124000 |
| B      | 9.31523100  | 4.86522400 | -2.27052700 |
| C      | 10.45632100 | 3.83305200 | -1.97593100 |
| C      | 11.35994700 | 3.97503300 | -0.90090700 |
| F      | 11.21957300 | 4.96642000 | -0.01436800 |
| C      | 12.41057900 | 3.09726600 | -0.65526400 |
| F      | 13.22578700 | 3.28734100 | 0.37617500  |
| C      | 12.58509200 | 1.99390900 | -1.49009300 |
| F      | 13.58623900 | 1.15464100 | -1.28438400 |
| C      | 11.69754300 | 1.77806300 | -2.54357700 |
| C      | 10.66879000 | 2.68936900 | -2.77455200 |

|   |             |             |             |
|---|-------------|-------------|-------------|
| F | 9.88239800  | 2.42202100  | -3.81534800 |
| F | 11.83093200 | 0.69891500  | -3.30730000 |
| C | 9.26114400  | 6.24297000  | -1.49855400 |
| C | 10.31156300 | 7.16256100  | -1.48697000 |
| F | 11.42337100 | 6.89670600  | -2.18328500 |
| C | 10.26245400 | 8.35220100  | -0.76271900 |
| F | 11.27886100 | 9.20903700  | -0.77967800 |
| C | 9.12336100  | 8.63839700  | -0.00319100 |
| F | 9.06457900  | 9.75778500  | 0.70626800  |
| C | 8.05128700  | 7.74346000  | 0.01267400  |
| C | 8.12573200  | 6.58182900  | -0.75597100 |
| F | 7.07417400  | 5.75294500  | -0.71364400 |
| F | 6.97815100  | 7.99925700  | 0.75687100  |
| C | 7.34159000  | 2.61058900  | 2.85052600  |
| C | 6.90280000  | 3.78436400  | 3.50521700  |
| C | 7.04559700  | 5.15611200  | 2.87830100  |
| C | 6.31868400  | 3.68140400  | 4.77334800  |
| C | 6.15525400  | 2.44541600  | 5.41188700  |
| C | 5.52062500  | 2.36655100  | 6.77736100  |
| C | 6.59470100  | 1.29946000  | 4.74528000  |
| C | 7.18946600  | 1.35599200  | 3.47274500  |
| C | 7.65512200  | 0.06683300  | 2.83969900  |
| C | 9.86507800  | 1.29901200  | 0.78660800  |
| C | 9.96651700  | 0.21514600  | -0.11137600 |
| C | 8.92052200  | -0.08730700 | -1.15421400 |
| C | 11.09109100 | -0.62012500 | -0.04320300 |
| C | 12.11938300 | -0.41502600 | 0.88301700  |
| C | 13.33379800 | -1.30569400 | 0.89722800  |
| C | 12.00341500 | 0.66928800  | 1.75597200  |
| C | 10.89925900 | 1.53361500  | 1.71824900  |
| C | 10.86644300 | 2.70414500  | 2.67444800  |
| H | 5.28503600  | 1.22192900  | 1.43322800  |
| H | 3.30873200  | 0.59135300  | 0.05803400  |
| H | 3.29891100  | 0.97164500  | -2.38337700 |
| H | 8.53366200  | 6.49325900  | -4.38552400 |
| H | 6.67787700  | 6.15481800  | -6.00101700 |
| H | 5.21466000  | 4.16898300  | -5.82788000 |
| H | 4.19498200  | 2.27183000  | -5.73010500 |

|   |             |             |             |
|---|-------------|-------------|-------------|
| H | 3.45673600  | 2.92519100  | -4.24154200 |
| H | 3.52631900  | 1.16596300  | -4.52929900 |
| H | 6.39809800  | 1.03380000  | -5.65180400 |
| H | 7.25462600  | 0.80177300  | -4.10827900 |
| H | 5.73863600  | -0.08497700 | -4.41862400 |
| H | 6.62349000  | 5.93501200  | 3.52900600  |
| H | 8.10369000  | 5.41468200  | 2.70195300  |
| H | 6.53280300  | 5.23156100  | 1.90589400  |
| H | 5.97702700  | 4.59155200  | 5.27621000  |
| H | 5.44493800  | 1.32722800  | 7.12891100  |
| H | 6.10465900  | 2.93325000  | 7.52170200  |
| H | 4.50559200  | 2.79731400  | 6.77148200  |
| H | 6.47302900  | 0.32445400  | 5.22677900  |
| H | 7.21643800  | -0.80216700 | 3.35146400  |
| H | 8.75070200  | -0.02841100 | 2.88944000  |
| H | 7.38717100  | 0.00888900  | 1.77571200  |
| H | 9.18301400  | -0.99179100 | -1.72073900 |
| H | 8.81515300  | 0.73886200  | -1.87128900 |
| H | 7.92966000  | -0.24086400 | -0.70283000 |
| H | 11.16666600 | -1.45644300 | -0.74445700 |
| H | 13.87193100 | -1.24203000 | 1.85455500  |
| H | 14.03608100 | -1.00967200 | 0.09977300  |
| H | 13.06438000 | -2.35870400 | 0.72167100  |
| H | 12.80021600 | 0.86111100  | 2.48009700  |
| H | 11.75618400 | 2.71269300  | 3.31906200  |
| H | 10.85251400 | 3.66566800  | 2.13454500  |
| H | 9.97700300  | 2.67658300  | 3.32351600  |

**Table S11**

**N<sub>2</sub>O**

Atomic Coordinates (Angstroms)

| Number | X          | Y           | Z           |
|--------|------------|-------------|-------------|
| N      | 2.90387200 | -0.43652600 | 0.12566500  |
| N      | 2.13052300 | -0.96440800 | -0.50754100 |
| O      | 1.32173300 | -1.51562300 | -1.16967000 |

-----  
**Table S12**  
**B/P-TS**  
-----

Atomic Coordinates (Angstroms)

| Number | X           | Y           | Z           |
|--------|-------------|-------------|-------------|
| P      | 2.31460300  | -0.10841100 | -0.76228700 |
| N      | 0.63217000  | -1.39062100 | -2.37617100 |
| N      | -0.34751600 | -0.91405500 | -2.04325600 |
| O      | -0.86339900 | 0.00625300  | -1.38430200 |
| B      | -2.13680800 | -0.36260000 | -0.31245400 |
| C      | -2.05276600 | -1.93633400 | -0.01910500 |
| C      | -0.89635700 | -2.57866000 | 0.45968200  |
| O      | 0.26138200  | -1.81324500 | 0.52926700  |
| C      | 1.47655500  | -2.44652400 | 0.54179100  |
| C      | 2.58433900  | -1.71764100 | 0.06418100  |
| C      | 3.83650300  | -2.35017700 | 0.05317400  |
| C      | 3.97412400  | -3.65823000 | 0.51627300  |
| C      | 2.86340900  | -4.34984800 | 1.00020500  |
| C      | 1.59636900  | -3.75371900 | 1.02998100  |
| C      | 0.36294800  | -4.41154100 | 1.64383400  |
| C      | -0.86802000 | -3.91090800 | 0.88795000  |
| C      | -2.03647200 | -4.66731400 | 0.72733600  |
| C      | -3.19075900 | -4.09245500 | 0.19968500  |
| C      | -3.19611800 | -2.74018300 | -0.14619700 |
| C      | 0.46790000  | -5.94133400 | 1.63663600  |
| C      | 0.23823300  | -3.92114400 | 3.11214200  |
| C      | -1.73227100 | 0.65584400  | 0.88051400  |
| C      | -1.57355100 | 0.30365500  | 2.22242000  |
| F      | -1.67659500 | -0.97012600 | 2.62952600  |
| C      | -1.30140900 | 1.23434200  | 3.22642500  |
| F      | -1.08921200 | 0.83680000  | 4.48233400  |
| C      | -1.20538700 | 2.58373900  | 2.90205900  |
| F      | -0.91415900 | 3.47898900  | 3.84431600  |
| C      | -1.36130900 | 2.98470000  | 1.57718100  |
| C      | -1.59680800 | 2.02060600  | 0.60119000  |

|   |             |             |             |
|---|-------------|-------------|-------------|
| F | -1.71473100 | 2.46011400  | -0.66118800 |
| F | -1.24319600 | 4.27404700  | 1.25396800  |
| C | -3.49156600 | 0.08652600  | -1.08129400 |
| C | -4.57172200 | 0.64700700  | -0.39242700 |
| F | -4.51436100 | 0.81973000  | 0.93582800  |
| C | -5.76033600 | 1.03406900  | -1.01614000 |
| F | -6.75735700 | 1.56584800  | -0.31188300 |
| C | -5.90059300 | 0.85209500  | -2.39202500 |
| F | -7.02316000 | 1.21387300  | -3.00533800 |
| C | -4.85764500 | 0.27579200  | -3.11791700 |
| C | -3.69022000 | -0.10036800 | -2.45151000 |
| F | -2.74004000 | -0.68399700 | -3.20191700 |
| F | -4.98740500 | 0.08273100  | -4.42942200 |
| C | 3.97580300  | 0.33195400  | -1.45997200 |
| C | 4.16294100  | 0.22254200  | -2.86316000 |
| C | 3.09774600  | -0.29822900 | -3.79544700 |
| C | 5.38705200  | 0.60350700  | -3.42453300 |
| C | 6.44398200  | 1.08853500  | -2.64952500 |
| C | 7.73714900  | 1.52589400  | -3.28578100 |
| C | 6.25073300  | 1.16798600  | -1.26919300 |
| C | 5.04498500  | 0.80362400  | -0.65392700 |
| C | 4.97887400  | 0.92801100  | 0.84699200  |
| C | 1.96214600  | 1.27071400  | 0.41177900  |
| C | 1.92608700  | 1.20639100  | 1.82674000  |
| C | 1.95633900  | -0.06948000 | 2.62882900  |
| C | 1.84977900  | 2.40632100  | 2.54863600  |
| C | 1.77771100  | 3.65860200  | 1.93573400  |
| C | 1.71928400  | 3.69002200  | 0.53944900  |
| C | 1.78731800  | 2.52780700  | -0.23229800 |
| C | 1.65225600  | 2.65938200  | -1.72988100 |
| C | 1.68022400  | 4.92705800  | 2.73955200  |
| H | 4.70344300  | -1.81732800 | -0.33704000 |
| H | 4.95378500  | -4.14030600 | 0.50036700  |
| H | 2.98905500  | -5.36789100 | 1.36813500  |
| H | -2.05251300 | -5.71254300 | 1.03612600  |
| H | -4.09457500 | -4.69374200 | 0.07991100  |
| H | -4.11814200 | -2.29099400 | -0.51913700 |
| H | -0.41740500 | -6.39392000 | 2.10354800  |

|   |             |             |             |
|---|-------------|-------------|-------------|
| H | 1.33346800  | -6.27725100 | 2.22455200  |
| H | 0.56416200  | -6.33677200 | 0.61437200  |
| H | -0.64605500 | -4.37356100 | 3.58680300  |
| H | 1.13443900  | -4.20126000 | 3.68778600  |
| H | 0.11788400  | -2.82993800 | 3.15901700  |
| H | 3.44283400  | -0.24741700 | -4.83749300 |
| H | 2.83843900  | -1.34346700 | -3.57545000 |
| H | 2.16733500  | 0.28303200  | -3.71735800 |
| H | 5.51599600  | 0.51442100  | -4.50661200 |
| H | 8.57182400  | 1.49297400  | -2.57006200 |
| H | 7.99555000  | 0.89420000  | -4.14931000 |
| H | 7.65953900  | 2.56363300  | -3.65393100 |
| H | 7.06994800  | 1.52179300  | -0.63710100 |
| H | 5.99391500  | 0.95944200  | 1.26782200  |
| H | 4.44827300  | 0.08923100  | 1.31206400  |
| H | 4.45952800  | 1.84818500  | 1.15241700  |
| H | 1.94812000  | 0.16074300  | 3.70257200  |
| H | 1.07296900  | -0.68428300 | 2.41530900  |
| H | 2.83990500  | -0.68776900 | 2.42018400  |
| H | 1.83312600  | 2.35178900  | 3.64005300  |
| H | 1.59468700  | 4.64946000  | 0.03103500  |
| H | 1.36263900  | 3.68474400  | -1.99765300 |
| H | 0.87504900  | 1.98078400  | -2.11271000 |
| H | 2.59019900  | 2.42717000  | -2.25752500 |
| H | 0.66016000  | 5.33796800  | 2.67966200  |
| H | 1.90890900  | 4.75273100  | 3.80036400  |
| H | 2.36913600  | 5.69606500  | 2.35587900  |

**Table S13**  
**AI/P-TS**

Atomic Coordinates (Angstroms)

| Number | X          | Y          | Z          |
|--------|------------|------------|------------|
| P      | 0.00000000 | 0.00000000 | 0.00000000 |
| N      | 0.00000000 | 0.00000000 | 2.68640900 |
| N      | 1.11778300 | 0.00000000 | 2.89277900 |



|    |             |             |             |
|----|-------------|-------------|-------------|
| O  | 2.27311500  | 0.08390600  | 2.44854800  |
| Al | 3.44338400  | -1.49659300 | 2.60799600  |
| C  | 2.21330700  | -2.90225100 | 3.19749600  |
| C  | 1.12929800  | -3.34506800 | 2.42791900  |
| O  | 0.79186000  | -2.55869400 | 1.32551100  |
| C  | -0.46694200 | -2.66337900 | 0.79267400  |
| C  | -0.95001400 | -1.56536100 | 0.05008800  |
| C  | -2.24791400 | -1.64401700 | -0.47769300 |
| C  | -3.02586600 | -2.78492900 | -0.28926900 |
| C  | -2.51139700 | -3.86924100 | 0.42046000  |
| C  | -1.22133400 | -3.83366700 | 0.96382400  |
| C  | -0.56359500 | -5.03518400 | 1.63960200  |
| C  | 0.40358100  | -4.51111300 | 2.69832200  |
| C  | 0.72037000  | -5.20280400 | 3.87587400  |
| C  | 1.74726800  | -4.76619200 | 4.71313200  |
| C  | 2.49986400  | -3.64394900 | 4.35721100  |
| C  | -1.59801400 | -6.00421500 | 2.22454800  |
| C  | 0.27872300  | -5.78216400 | 0.56942300  |
| C  | 4.19875500  | -1.62914400 | 0.78513000  |
| C  | 4.17165500  | -2.78567700 | 0.01095300  |
| F  | 3.51321800  | -3.87770000 | 0.44249900  |
| C  | 4.79599500  | -2.87979900 | -1.23259100 |
| F  | 4.68877200  | -3.97961000 | -1.98129600 |
| C  | 5.49173800  | -1.77533200 | -1.72242600 |
| F  | 6.05088600  | -1.82730600 | -2.93008400 |
| C  | 5.54077200  | -0.59365300 | -0.98244400 |
| C  | 4.87812900  | -0.54335600 | 0.24061700  |
| F  | 4.90897800  | 0.62021500  | 0.91669800  |
| F  | 6.16141100  | 0.47774400  | -1.48096000 |
| C  | 4.73767600  | -0.89743300 | 3.98945300  |
| C  | 6.12110700  | -0.99890200 | 3.85702200  |
| F  | 6.65132300  | -1.55948400 | 2.75788700  |
| C  | 7.01323400  | -0.54286600 | 4.83049600  |
| F  | 8.33047900  | -0.65613200 | 4.67020400  |
| C  | 6.50425500  | 0.04044000  | 5.99381100  |
| F  | 7.33439400  | 0.47955300  | 6.93418800  |
| C  | 5.12307700  | 0.15970800  | 6.17196400  |
| C  | 4.27786800  | -0.31031500 | 5.16628500  |

|   |             |             |             |
|---|-------------|-------------|-------------|
| F | 2.95040100  | -0.18134600 | 5.36667100  |
| F | 4.64217500  | 0.71533900  | 7.28326000  |
| C | -1.15507300 | 1.19906700  | -0.82494300 |
| C | -1.77087700 | 2.19637400  | -0.02367400 |
| C | -1.57968500 | 2.28268500  | 1.46987800  |
| C | -2.59818200 | 3.15035200  | -0.62662800 |
| C | -2.84727300 | 3.15837100  | -2.00178100 |
| C | -3.71355700 | 4.21960800  | -2.62763800 |
| C | -2.25231800 | 2.15776800  | -2.77171900 |
| C | -1.41295900 | 1.17892400  | -2.22086200 |
| C | -0.85122100 | 0.15241000  | -3.17172900 |
| C | 1.43432000  | -0.04973500 | -1.16436100 |
| C | 1.83143800  | -1.13323700 | -1.98676700 |
| C | 1.29098700  | -2.53540600 | -1.87351900 |
| C | 2.79047400  | -0.90093500 | -2.98250600 |
| C | 3.39840000  | 0.34076800  | -3.17761300 |
| C | 3.07528300  | 1.36256200  | -2.28010100 |
| C | 2.12362200  | 1.19107600  | -1.27096000 |
| C | 1.87751100  | 2.34234800  | -0.32637300 |
| C | 4.41602800  | 0.55960800  | -4.26509800 |
| H | -2.65530900 | -0.79641900 | -1.02772000 |
| H | -4.03539200 | -2.82991000 | -0.70296100 |
| H | -3.12300900 | -4.76255200 | 0.54429400  |
| H | 0.17000800  | -6.10742400 | 4.13538700  |
| H | 1.97586700  | -5.31834300 | 5.62763800  |
| H | 3.33334300  | -3.33836800 | 4.99669900  |
| H | -1.10148900 | -6.86749900 | 2.68813400  |
| H | -2.24831100 | -6.40826700 | 1.43618600  |
| H | -2.22841500 | -5.51585100 | 2.98267200  |
| H | 0.77504300  | -6.65480900 | 1.02138400  |
| H | -0.36534000 | -6.12598100 | -0.25525800 |
| H | 1.06148400  | -5.13205400 | 0.15358900  |
| H | -2.12340600 | 3.14671400  | 1.87653600  |
| H | -1.94551800 | 1.38180500  | 1.98223500  |
| H | -0.51849100 | 2.39582900  | 1.73672000  |
| H | -3.06406200 | 3.91207000  | 0.00444900  |
| H | -4.10544100 | 3.89863000  | -3.60396100 |
| H | -4.56555000 | 4.47758300  | -1.98003600 |

|   |             |             |             |
|---|-------------|-------------|-------------|
| H | -3.13809700 | 5.14715600  | -2.79134500 |
| H | -2.44965900 | 2.12648800  | -3.84683800 |
| H | -1.46698900 | 0.10598500  | -4.08126300 |
| H | -0.82177300 | -0.85184100 | -2.73453500 |
| H | 0.17570700  | 0.40435500  | -3.47440900 |
| H | 1.79069800  | -3.19068100 | -2.59960100 |
| H | 1.47748000  | -2.94707300 | -0.87466400 |
| H | 0.20816300  | -2.59158900 | -2.05355100 |
| H | 3.07720300  | -1.73570800 | -3.62722400 |
| H | 3.58662400  | 2.32547900  | -2.35918400 |
| H | 2.63149000  | 3.12690300  | -0.47811900 |
| H | 1.94339700  | 2.01119000  | 0.72080100  |
| H | 0.88590600  | 2.79795700  | -0.47147800 |
| H | 5.42256400  | 0.67502700  | -3.83465900 |
| H | 4.44657100  | -0.28661700 | -4.96557200 |
| H | 4.19491200  | 1.47573200  | -4.83542700 |

**Table S14**  
**Ga/P-TS**

Atomic Coordinates (Angstroms)

| Number | X           | Y          | Z           |
|--------|-------------|------------|-------------|
| P      | 2.40126800  | 0.09313700 | 0.89199000  |
| N      | 0.86297900  | 1.52901100 | 2.26515000  |
| N      | -0.17290900 | 1.04580400 | 2.13703900  |
| O      | -0.73054000 | 0.04225200 | 1.64110800  |
| Ga     | -2.07557100 | 0.46621200 | 0.09580100  |
| C      | -1.70050500 | 2.36104800 | -0.28179800 |
| C      | -0.45509900 | 2.80959300 | -0.73488900 |
| O      | 0.60309300  | 1.90720800 | -0.65463100 |
| C      | 1.88449200  | 2.38979600 | -0.64870700 |
| C      | 2.87709600  | 1.58697700 | -0.04921700 |
| C      | 4.19297200  | 2.07358300 | -0.01740500 |
| C      | 4.50774800  | 3.30936100 | -0.57950100 |
| C      | 3.51112800  | 4.07393500 | -1.18545000 |
| C      | 2.18600400  | 3.62555700 | -1.23976800 |

|   |             |             |             |
|---|-------------|-------------|-------------|
| C | 1.07706400  | 4.36452100  | -1.98610100 |
| C | -0.24065500 | 4.08751300  | -1.26516100 |
| C | -1.31307000 | 4.98903000  | -1.22106200 |
| C | -2.55371300 | 4.60667800  | -0.70993800 |
| C | -2.74791400 | 3.29412200  | -0.27147000 |
| C | 1.36838200  | 5.86446800  | -2.11155200 |
| C | 0.96730500  | 3.75061600  | -3.40868300 |
| C | -1.53571000 | -0.89667700 | -1.24887800 |
| C | -1.22186800 | -0.56904000 | -2.56373800 |
| F | -1.13988500 | 0.71878800  | -2.94558800 |
| C | -0.97053600 | -1.53161900 | -3.54144200 |
| F | -0.61163200 | -1.18458900 | -4.77894700 |
| C | -1.05353200 | -2.87909500 | -3.19502500 |
| F | -0.77676300 | -3.81407800 | -4.10506500 |
| C | -1.35261500 | -3.24975400 | -1.88362100 |
| C | -1.57181900 | -2.25207900 | -0.93668800 |
| F | -1.83160400 | -2.63774000 | 0.32263900  |
| F | -1.36743700 | -4.54009100 | -1.54790600 |
| C | -3.79437900 | 0.08193100  | 1.03308500  |
| C | -4.75765700 | -0.79194700 | 0.53610000  |
| F | -4.57769700 | -1.39127600 | -0.65153900 |
| C | -5.93805500 | -1.08355200 | 1.22380800  |
| F | -6.84024400 | -1.92507900 | 0.72203100  |
| C | -6.17056900 | -0.47298100 | 2.45883400  |
| F | -7.28858300 | -0.73420200 | 3.12862100  |
| C | -5.23057400 | 0.41448400  | 2.98969100  |
| C | -4.06560600 | 0.67176100  | 2.26492400  |
| F | -3.18161500 | 1.53086600  | 2.80224500  |
| F | -5.45798700 | 0.99568400  | 4.16670600  |
| C | 3.96636400  | -0.43361600 | 1.73972000  |
| C | 4.09377500  | -0.22798600 | 3.13853200  |
| C | 3.03574000  | 0.44555900  | 3.97521500  |
| C | 5.24987000  | -0.66794000 | 3.79390000  |
| C | 6.29403300  | -1.30592100 | 3.11991000  |
| C | 7.50915000  | -1.80147200 | 3.85872800  |
| C | 6.15997500  | -1.48314500 | 1.74177100  |
| C | 5.02439900  | -1.06656300 | 1.03376100  |
| C | 5.02270100  | -1.31723000 | -0.45321700 |

|   |             |             |             |
|---|-------------|-------------|-------------|
| C | 1.98301100  | -1.36196000 | -0.16087000 |
| C | 2.01989400  | -1.42143000 | -1.57925100 |
| C | 2.17475600  | -0.22389500 | -2.48110500 |
| C | 1.90768500  | -2.67227700 | -2.19584200 |
| C | 1.72436800  | -3.86060300 | -1.48056900 |
| C | 1.57788200  | -3.76112300 | -0.09702100 |
| C | 1.69059700  | -2.53980000 | 0.57801100  |
| C | 1.48234400  | -2.53836100 | 2.07203600  |
| C | 1.65252900  | -5.18617000 | -2.19004500 |
| H | 4.97127200  | 1.48655300  | 0.46883600  |
| H | 5.53534200  | 3.67683400  | -0.54479100 |
| H | 3.77340200  | 5.03317500  | -1.63105700 |
| H | -1.18519300 | 6.00038400  | -1.60741500 |
| H | -3.37545500 | 5.32577100  | -0.68004800 |
| H | -3.73625300 | 2.98858900  | 0.08327100  |
| H | 0.56597300  | 6.36945200  | -2.66647100 |
| H | 2.29387500  | 6.03914500  | -2.67789300 |
| H | 1.46522800  | 6.34305100  | -1.12554900 |
| H | 0.16923100  | 4.25382900  | -3.97602800 |
| H | 1.91842900  | 3.86752300  | -3.95165500 |
| H | 0.71992600  | 2.68053000  | -3.36326800 |
| H | 3.33567700  | 0.45825800  | 5.03214100  |
| H | 2.86051100  | 1.48334500  | 3.65986600  |
| H | 2.07028300  | -0.07659900 | 3.90574500  |
| H | 5.33290100  | -0.50297700 | 4.87144600  |
| H | 8.38259500  | -1.87967900 | 3.19459800  |
| H | 7.76921400  | -1.13847800 | 4.69778500  |
| H | 7.32616700  | -2.80472300 | 4.28118500  |
| H | 6.97169900  | -1.95997600 | 1.18548900  |
| H | 6.05209900  | -1.46142300 | -0.81083500 |
| H | 4.58491800  | -0.48746300 | -1.01930800 |
| H | 4.44930200  | -2.22076600 | -0.70704800 |
| H | 2.13504300  | -0.53821800 | -3.53277900 |
| H | 1.36330300  | 0.49533700  | -2.32053200 |
| H | 3.12189800  | 0.31083900  | -2.32233200 |
| H | 1.95710700  | -2.71579700 | -3.28709200 |
| H | 1.36207500  | -4.66115000 | 0.48380300  |
| H | 1.11121900  | -3.51734800 | 2.40477000  |

|   |            |             |             |
|---|------------|-------------|-------------|
| H | 0.73974900 | -1.78026000 | 2.36098800  |
| H | 2.41204400 | -2.32913900 | 2.62291500  |
| H | 1.33182200 | -5.98833600 | -1.51097900 |
| H | 0.94609800 | -5.14761000 | -3.03133300 |
| H | 2.63796100 | -5.46204200 | -2.60205000 |

**Table S15**  
**In/P-TS**

Atomic Coordinates (Angstroms)

| Number | X           | Y           | Z           |
|--------|-------------|-------------|-------------|
| P      | 2.41351000  | 0.09362500  | 0.96129100  |
| N      | 1.01687400  | 1.60427500  | 2.20462400  |
| N      | -0.05932400 | 1.17222800  | 2.19944700  |
| O      | -0.64801900 | 0.13456000  | 1.80909800  |
| In     | -2.02391400 | 0.51893400  | -0.00816900 |
| C      | -1.49800800 | 2.57008100  | -0.42259500 |
| C      | -0.21381400 | 2.92986200  | -0.83918800 |
| O      | 0.78989000  | 1.97168000  | -0.70128200 |
| C      | 2.09179600  | 2.39133300  | -0.62906000 |
| C      | 3.01092300  | 1.55565300  | 0.03793900  |
| C      | 4.34141000  | 1.98755300  | 0.14623400  |
| C      | 4.74452500  | 3.19791600  | -0.41439500 |
| C      | 3.82252100  | 3.99158100  | -1.09605900 |
| C      | 2.48509900  | 3.59949300  | -1.22406500 |
| C      | 1.45587200  | 4.36851700  | -2.04963700 |
| C      | 0.09418000  | 4.18354400  | -1.38357200 |
| C      | -0.92238200 | 5.14798000  | -1.39419000 |
| C      | -2.20036800 | 4.85052300  | -0.91913700 |
| C      | -2.48949400 | 3.56084600  | -0.46400100 |
| C      | 1.83128400  | 5.84594000  | -2.20955000 |
| C      | 1.38277100  | 3.71191500  | -3.45537500 |
| C      | -1.38584700 | -1.05033700 | -1.37818200 |
| C      | -1.00152200 | -0.77456800 | -2.68343700 |
| F      | -0.87591400 | 0.50185000  | -3.09708900 |
| C      | -0.71579100 | -1.77957300 | -3.60756600 |

|   |             |             |             |
|---|-------------|-------------|-------------|
| F | -0.27509400 | -1.49112900 | -4.83434400 |
| C | -0.84167300 | -3.11173700 | -3.21244600 |
| F | -0.52334300 | -4.08770600 | -4.06158600 |
| C | -1.22580900 | -3.42325300 | -1.90740300 |
| C | -1.46938300 | -2.38619500 | -1.00967700 |
| F | -1.78946000 | -2.71398900 | 0.25211500  |
| F | -1.29008900 | -4.70005300 | -1.52209700 |
| C | -3.94358900 | 0.12124000  | 0.96165600  |
| C | -4.80045000 | -0.89365400 | 0.54987600  |
| F | -4.49825700 | -1.64154100 | -0.52388500 |
| C | -5.99697700 | -1.17779900 | 1.21280400  |
| F | -6.80176200 | -2.15616600 | 0.80079100  |
| C | -6.35219800 | -0.41116600 | 2.32621200  |
| F | -7.48815600 | -0.66290200 | 2.96927000  |
| C | -5.51738900 | 0.62090400  | 2.76443100  |
| C | -4.33140600 | 0.86611700  | 2.06950100  |
| F | -3.54743300 | 1.86617000  | 2.51033800  |
| F | -5.86526100 | 1.34872500  | 3.82493400  |
| C | 3.89241600  | -0.48354200 | 1.92359700  |
| C | 3.92265900  | -0.32149200 | 3.33221500  |
| C | 2.81335900  | 0.32087400  | 4.12585500  |
| C | 5.02993100  | -0.79221300 | 4.05215200  |
| C | 6.11238300  | -1.41905000 | 3.43524400  |
| C | 7.28668300  | -1.92971400 | 4.22771500  |
| C | 6.06714100  | -1.56661100 | 2.04636200  |
| C | 4.98703300  | -1.12255800 | 1.27519500  |
| C | 5.07631400  | -1.36397800 | -0.21149300 |
| C | 2.03165900  | -1.36057200 | -0.10930400 |
| C | 2.15275900  | -1.41508600 | -1.52159000 |
| C | 2.34556300  | -0.21924200 | -2.41767800 |
| C | 2.09936300  | -2.66766700 | -2.14669000 |
| C | 1.89315700  | -3.85889200 | -1.44842600 |
| C | 1.65642500  | -3.76536900 | -0.07428900 |
| C | 1.70629500  | -2.54651000 | 0.60851900  |
| C | 1.40155600  | -2.55347100 | 2.08535300  |
| C | 1.86201600  | -5.18864900 | -2.15296800 |
| H | 5.06204100  | 1.37996300  | 0.69175200  |
| H | 5.78267800  | 3.52228700  | -0.31895600 |

|   |             |             |             |
|---|-------------|-------------|-------------|
| H | 4.15373800  | 4.92936600  | -1.54142400 |
| H | -0.72034900 | 6.14230300  | -1.79274000 |
| H | -2.97734800 | 5.61839000  | -0.92850800 |
| H | -3.50404900 | 3.32686300  | -0.12992600 |
| H | 1.08359000  | 6.37084200  | -2.81974800 |
| H | 2.79084500  | 5.95269000  | -2.73468900 |
| H | 1.90582200  | 6.35379600  | -1.23636800 |
| H | 0.63896500  | 4.23349200  | -4.07720100 |
| H | 2.36322800  | 3.76361000  | -3.95449400 |
| H | 1.08155400  | 2.65669500  | -3.38830100 |
| H | 3.02787600  | 0.25384100  | 5.20122200  |
| H | 2.68571700  | 1.38184600  | 3.87107000  |
| H | 1.84736500  | -0.17213200 | 3.94576600  |
| H | 5.03780000  | -0.66224900 | 5.13730800  |
| H | 8.23771800  | -1.55526600 | 3.81611600  |
| H | 7.22677900  | -1.62640100 | 5.28274100  |
| H | 7.33398500  | -3.03116400 | 4.19517900  |
| H | 6.90687100  | -2.04553900 | 1.53487300  |
| H | 6.12551100  | -1.51134500 | -0.50439500 |
| H | 4.67828000  | -0.53275500 | -0.80316700 |
| H | 4.51744700  | -2.26561700 | -0.50204000 |
| H | 2.32763300  | -0.53468000 | -3.46950400 |
| H | 1.53904800  | 0.50888500  | -2.27846300 |
| H | 3.29684000  | 0.30137400  | -2.23639200 |
| H | 2.21831900  | -2.70673700 | -3.23239800 |
| H | 1.41705900  | -4.67016500 | 0.49037300  |
| H | 0.95737800  | -3.51570500 | 2.37457700  |
| H | 0.68562200  | -1.75943000 | 2.34174100  |
| H | 2.30579700  | -2.40612500 | 2.69542900  |
| H | 0.84339400  | -5.60506500 | -2.15156400 |
| H | 2.18595500  | -5.09847800 | -3.19915200 |
| H | 2.51517300  | -5.91814600 | -1.64819200 |

-----

**Table S16**  
**TI/P-TS**

-----

Atomic Coordinates (Angstroms)



| Number | X           | Y           | Z           |
|--------|-------------|-------------|-------------|
| P      | 0.00000000  | 0.00000000  | 0.00000000  |
| N      | 0.00000000  | 0.00000000  | 2.29226600  |
| N      | 1.11019800  | 0.00000000  | 2.66616900  |
| O      | 2.22861800  | 0.08090300  | 2.10436300  |
| TI     | 3.41693700  | -2.08349300 | 2.22327600  |
| C      | 1.77394300  | -3.26630900 | 3.07036300  |
| C      | 0.59815200  | -3.48631200 | 2.35015100  |
| O      | 0.36935500  | -2.69317200 | 1.23264700  |
| C      | -0.92025800 | -2.53351400 | 0.79653300  |
| C      | -1.22684300 | -1.35557500 | 0.08609000  |
| C      | -2.54801300 | -1.16837700 | -0.34594800 |
| C      | -3.52139100 | -2.13449900 | -0.09798200 |
| C      | -3.18669500 | -3.30188500 | 0.58713200  |
| C      | -1.88107400 | -3.52578200 | 1.03890300  |
| C      | -1.42850000 | -4.82344200 | 1.70465500  |
| C      | -0.33151800 | -4.47259400 | 2.70810300  |
| C      | -0.11260300 | -5.16444500 | 3.90655500  |
| C      | 1.01543200  | -4.91179000 | 4.68815500  |
| C      | 1.96981500  | -3.98705600 | 4.25362600  |
| C      | -2.59453600 | -5.57603500 | 2.35504100  |
| C      | -0.79156600 | -5.72603100 | 0.61266400  |
| C      | 4.01374100  | -2.37970800 | 0.09323300  |
| C      | 3.67339700  | -3.54660300 | -0.57518300 |
| F      | 2.84116000  | -4.43968500 | -0.00408900 |
| C      | 4.15447500  | -3.84025900 | -1.85103800 |
| F      | 3.76516100  | -4.93624800 | -2.50573400 |
| C      | 5.02958700  | -2.94095400 | -2.46093900 |
| F      | 5.46888100  | -3.18134700 | -3.69748500 |
| C      | 5.38418400  | -1.75509900 | -1.81590200 |
| C      | 4.85697700  | -1.48715400 | -0.55317200 |
| F      | 5.18328000  | -0.32369300 | 0.02612000  |
| F      | 6.17078200  | -0.87587200 | -2.43753700 |
| C      | 5.06734700  | -1.22849800 | 3.45592600  |
| C      | 6.39330300  | -1.27935400 | 3.04501200  |
| F      | 6.73452700  | -1.94593600 | 1.93094000  |
| C      | 7.41601600  | -0.65595800 | 3.76391800  |

|   |             |             |             |
|---|-------------|-------------|-------------|
| F | 8.68293500  | -0.71330600 | 3.35611600  |
| C | 7.09562400  | 0.03392200  | 4.93660900  |
| F | 8.05521700  | 0.63013700  | 5.63756900  |
| C | 5.77067000  | 0.09512300  | 5.37780100  |
| C | 4.77842900  | -0.54114900 | 4.62804600  |
| F | 3.51624600  | -0.47153300 | 5.07711500  |
| F | 5.47733900  | 0.75070700  | 6.50008200  |
| C | -0.94489700 | 1.43702700  | -0.69760600 |
| C | -1.25327600 | 2.55755700  | 0.12097700  |
| C | -0.85974000 | 2.67361800  | 1.57157300  |
| C | -1.94272000 | 3.63996700  | -0.43728400 |
| C | -2.34269800 | 3.66735200  | -1.77574000 |
| C | -3.08380800 | 4.85261200  | -2.33573500 |
| C | -2.02867800 | 2.56079800  | -2.56421800 |
| C | -1.33538400 | 1.44923000  | -2.06426000 |
| C | -1.05438600 | 0.33915300  | -3.04702800 |
| C | 1.32827300  | -0.26925400 | -1.25373500 |
| C | 1.46438800  | -1.40770400 | -2.09427300 |
| C | 0.70497900  | -2.69867100 | -1.92786800 |
| C | 2.35934500  | -1.34005300 | -3.16668500 |
| C | 3.15823300  | -0.22134500 | -3.42376900 |
| C | 3.08966600  | 0.83674700  | -2.51832600 |
| C | 2.19960900  | 0.83926400  | -1.43703500 |
| C | 2.22113900  | 2.03560300  | -0.52023000 |
| C | 4.06783300  | -0.17990600 | -4.62227300 |
| H | -2.82165300 | -0.24833200 | -0.86020900 |
| H | -4.54616800 | -1.97315400 | -0.43833500 |
| H | -3.95549700 | -4.05286500 | 0.76733300  |
| H | -0.82348500 | -5.92528100 | 4.22886100  |
| H | 1.16473600  | -5.45689700 | 5.62289300  |
| H | 2.87351300  | -3.82734700 | 4.84763700  |
| H | -2.24412300 | -6.51172200 | 2.81187400  |
| H | -3.34564000 | -5.85943200 | 1.60448600  |
| H | -3.08596400 | -4.97109600 | 3.13161100  |
| H | -0.44037700 | -6.66883600 | 1.05962300  |
| H | -1.52975900 | -5.95719200 | -0.17129300 |
| H | 0.07311800  | -5.23601500 | 0.14257600  |
| H | -1.13411500 | 3.66405700  | 1.95962500  |

|   |             |             |             |
|---|-------------|-------------|-------------|
| H | -1.35097600 | 1.91424500  | 2.19460200  |
| H | 0.22362000  | 2.54841600  | 1.70938100  |
| H | -2.17024000 | 4.49611100  | 0.20342900  |
| H | -3.32191000 | 4.71639400  | -3.40038100 |
| H | -4.02890000 | 5.02067100  | -1.79364000 |
| H | -2.48793100 | 5.77458500  | -2.23532800 |
| H | -2.33262500 | 2.55244100  | -3.61434100 |
| H | -1.75532400 | 0.40093400  | -3.89151600 |
| H | -1.15129600 | -0.65833000 | -2.60593300 |
| H | -0.03431700 | 0.41641200  | -3.45130900 |
| H | 1.05127200  | -3.43268800 | -2.66784000 |
| H | 0.87318400  | -3.12868800 | -0.93466000 |
| H | -0.37987800 | -2.57558900 | -2.05643000 |
| H | 2.43995100  | -2.20852400 | -3.82543400 |
| H | 3.75025300  | 1.69708700  | -2.65019100 |
| H | 3.10825000  | 2.65068200  | -0.72409400 |
| H | 2.25834800  | 1.72167700  | 0.53247100  |
| H | 1.33498700  | 2.67413600  | -0.65580100 |
| H | 4.80635700  | 0.62925800  | -4.53873600 |
| H | 4.61150000  | -1.12717000 | -4.74559500 |
| H | 3.48554500  | -0.01437600 | -5.54482700 |

-----

**Table S17**  
**B/N-TS**

-----

Atomic Coordinates (Angstroms)

| Number | X           | Y           | Z           |
|--------|-------------|-------------|-------------|
| N      | 2.58738500  | -0.08562100 | 0.44732200  |
| N      | 1.19134500  | 0.21518000  | 1.60727500  |
| N      | 0.24760800  | -0.17857500 | 0.96276700  |
| O      | -1.01595000 | 0.11383000  | 1.54695200  |
| B      | -2.05592800 | 0.40594400  | 0.40443800  |
| C      | -1.93240200 | 1.95888600  | -0.03098600 |
| C      | -0.72154300 | 2.53834600  | -0.43679000 |
| O      | 0.39297700  | 1.66030300  | -0.45837900 |
| C      | 1.68060600  | 2.12579900  | -0.52390700 |

|   |             |             |             |
|---|-------------|-------------|-------------|
| C | 2.75146600  | 1.26352500  | -0.19350700 |
| C | 4.06144200  | 1.69225400  | -0.42078300 |
| C | 4.31644800  | 2.94411500  | -0.96272000 |
| C | 3.25740800  | 3.80704200  | -1.22928600 |
| C | 1.93797300  | 3.42045100  | -1.00063900 |
| C | 0.78913400  | 4.38665400  | -1.32754700 |
| C | -0.55952200 | 3.85917400  | -0.82860100 |
| C | -1.70279600 | 4.66978900  | -0.83630500 |
| C | -2.93318000 | 4.15175900  | -0.44678800 |
| C | -3.03883500 | 2.81775200  | -0.04399800 |
| C | 1.08512500  | 5.75679400  | -0.66340000 |
| C | 0.70499100  | 4.53011200  | -2.87234300 |
| C | -1.78002800 | -0.65134000 | -0.79217300 |
| C | -1.41004600 | -0.33731600 | -2.09164700 |
| F | -1.20642500 | 0.95695300  | -2.51130100 |
| C | -1.14161100 | -1.31351300 | -3.03835700 |
| F | -0.62690400 | -0.98421200 | -4.26838600 |
| C | -1.27888300 | -2.64417200 | -2.70645200 |
| F | -0.95726700 | -3.60288100 | -3.63079800 |
| C | -1.62496500 | -3.00310900 | -1.41725200 |
| C | -1.86209300 | -2.00659700 | -0.48177600 |
| F | -2.15905000 | -2.39338600 | 0.79909800  |
| F | -1.65581800 | -4.33206100 | -1.07588100 |
| C | -3.47039100 | 0.10236200  | 1.12145700  |
| C | -4.59669200 | 0.01104200  | 0.31677200  |
| F | -4.46430200 | 0.22866200  | -1.03577300 |
| C | -5.86123100 | -0.25738900 | 0.81907600  |
| F | -6.94946600 | -0.33349100 | -0.00295500 |
| C | -6.01183300 | -0.44659700 | 2.18516600  |
| F | -7.24428900 | -0.71833500 | 2.70635500  |
| C | -4.91206800 | -0.34889300 | 3.02060300  |
| C | -3.65930700 | -0.06677000 | 2.48621000  |
| F | -2.62910600 | 0.04044600  | 3.37876700  |
| F | -5.06632200 | -0.52608900 | 4.36688800  |
| C | 3.78434300  | -0.35379800 | 1.32508800  |
| C | 3.92254100  | 0.31189500  | 2.56545000  |
| C | 3.00399300  | 1.38393400  | 3.14260000  |
| C | 5.05155300  | 0.02000400  | 3.33887300  |

|   |             |             |             |
|---|-------------|-------------|-------------|
| C | 6.05555800  | -0.84790300 | 2.91449300  |
| C | 7.26608700  | -1.10741900 | 3.78707200  |
| C | 5.93361400  | -1.41083000 | 1.64801700  |
| C | 4.82314800  | -1.17150200 | 0.82835600  |
| C | 4.87733800  | -1.77537900 | -0.56851100 |
| C | 2.15464400  | -1.25944600 | -0.34990000 |
| C | 1.91046500  | -1.21862900 | -1.74012800 |
| C | 1.90446600  | 0.01632900  | -2.62880400 |
| C | 1.62686300  | -2.42791900 | -2.39400600 |
| C | 1.54130100  | -3.64392700 | -1.72440400 |
| C | 1.70436800  | -3.63750000 | -0.33874200 |
| C | 1.99883800  | -2.47599700 | 0.36990400  |
| C | 2.15560500  | -2.63107700 | 1.87602900  |
| C | 1.17891600  | -4.93073500 | -2.43435500 |
| H | 4.88071500  | 1.04129000  | -0.16281000 |
| H | 5.33669100  | 3.24760700  | -1.15662500 |
| H | 3.46119300  | 4.79000400  | -1.63217500 |
| H | -1.63161400 | 5.70034500  | -1.16045000 |
| H | -3.81302800 | 4.78391700  | -0.46196500 |
| H | -4.00087700 | 2.43180000  | 0.26101200  |
| H | 0.29347600  | 6.47132000  | -0.90055200 |
| H | 2.02982600  | 6.17263800  | -1.02474500 |
| H | 1.13928800  | 5.63737500  | 0.42250500  |
| H | -0.09240600 | 5.23212700  | -3.13515000 |
| H | 1.65414500  | 4.90044700  | -3.27609000 |
| H | 0.47678600  | 3.55797100  | -3.32011000 |
| H | 3.57194500  | 1.96738900  | 3.87508400  |
| H | 2.62874700  | 2.05620800  | 2.36985800  |
| H | 2.14015500  | 0.94091100  | 3.64182900  |
| H | 5.15214600  | 0.51736000  | 4.29721500  |
| H | 7.98886800  | -1.74818200 | 3.27489700  |
| H | 7.76182100  | -0.16414200 | 4.04455400  |
| H | 6.97020000  | -1.59809100 | 4.72148200  |
| H | 6.72985900  | -2.03743500 | 1.26333000  |
| H | 5.91420600  | -2.04583500 | -0.78847200 |
| H | 4.53939800  | -1.07321000 | -1.33254800 |
| H | 4.26062700  | -2.67339800 | -0.64683400 |
| H | 1.72815800  | -0.30175000 | -3.65895000 |

|   |            |             |             |
|---|------------|-------------|-------------|
| H | 1.07485500 | 0.66810600  | -2.35595000 |
| H | 2.83969400 | 0.57785200  | -2.58401800 |
| H | 1.40695800 | -2.39250600 | -3.45435900 |
| H | 1.58146100 | -4.56265800 | 0.21288000  |
| H | 1.64177900 | -3.54829600 | 2.18574500  |
| H | 1.71760600 | -1.79109800 | 2.41813300  |
| H | 3.21115600 | -2.70821000 | 2.16044500  |
| H | 1.87273400 | -5.73127100 | -2.15716000 |
| H | 0.16729900 | -5.21761600 | -2.13533300 |
| H | 1.19089100 | -4.80264100 | -3.51748700 |

**Table S18**  
**B/As-TS**

Atomic Coordinates (Angstroms)

| Number | X           | Y           | Z           |
|--------|-------------|-------------|-------------|
| As     | 2.82758000  | 0.29579600  | 0.72184700  |
| N      | 1.36250600  | 0.88522700  | 2.91777600  |
| N      | 0.38877400  | 0.40334700  | 2.57050700  |
| O      | -0.10955500 | -0.34577200 | 1.71107800  |
| B      | -1.57242800 | 0.09651200  | 0.96387700  |
| C      | -1.71462600 | 1.68414900  | 1.14010100  |
| C      | -0.73676400 | 2.60339900  | 0.71768900  |
| O      | 0.46208200  | 2.07378300  | 0.26071500  |
| C      | 1.58337700  | 2.86416500  | 0.26718500  |
| C      | 2.82303200  | 2.20846600  | 0.34709600  |
| C      | 3.98885600  | 2.98192400  | 0.37857600  |
| C      | 3.90908000  | 4.37419200  | 0.31234900  |
| C      | 2.66593300  | 5.00121400  | 0.21495600  |
| C      | 1.47883700  | 4.25785700  | 0.18278100  |
| C      | 0.09370600  | 4.86446100  | -0.02691300 |
| C      | -0.92385700 | 3.99091800  | 0.70901100  |
| C      | -2.11717500 | 4.48496500  | 1.25207400  |
| C      | -3.09174300 | 3.61673500  | 1.74033300  |
| C      | -2.89430400 | 2.23711200  | 1.66214300  |
| C      | 0.03742700  | 6.32912400  | 0.42296600  |

|   |             |             |             |
|---|-------------|-------------|-------------|
| C | -0.23810900 | 4.78727800  | -1.54216600 |
| C | -1.25605700 | -0.48811000 | -0.51473100 |
| C | -1.37088900 | 0.23236100  | -1.70552000 |
| F | -1.68879100 | 1.53492100  | -1.70687400 |
| C | -1.17125800 | -0.33934400 | -2.96272900 |
| F | -1.22722500 | 0.40820200  | -4.06648400 |
| C | -0.86572100 | -1.69328400 | -3.05930400 |
| F | -0.65228200 | -2.24597700 | -4.25195900 |
| C | -0.74248600 | -2.45547900 | -1.89996100 |
| C | -0.91877300 | -1.83850200 | -0.66373200 |
| F | -0.76801600 | -2.61447900 | 0.42150900  |
| F | -0.42698300 | -3.74880700 | -1.98558800 |
| C | -2.73172000 | -0.75094000 | 1.71691000  |
| C | -3.86776400 | -1.17762200 | 1.02163000  |
| F | -4.01760300 | -0.87866600 | -0.27686700 |
| C | -4.90514500 | -1.89926100 | 1.61635900  |
| F | -5.96408500 | -2.28213000 | 0.90594300  |
| C | -4.82696700 | -2.21336200 | 2.97341500  |
| F | -5.80246100 | -2.90002200 | 3.56002400  |
| C | -3.72272600 | -1.78954600 | 3.71317200  |
| C | -2.71215900 | -1.06530600 | 3.07763000  |
| F | -1.69640100 | -0.65719300 | 3.85763700  |
| F | -3.64594900 | -2.07008400 | 5.01297400  |
| C | 4.74841300  | -0.05592300 | 1.02166700  |
| C | 5.15667700  | -0.36754000 | 2.34285800  |
| C | 4.20194400  | -0.38541000 | 3.51247100  |
| C | 6.50082500  | -0.66841700 | 2.58751900  |
| C | 7.46042100  | -0.66880900 | 1.56948400  |
| C | 8.89707200  | -1.01197100 | 1.86608900  |
| C | 7.03803400  | -0.34855800 | 0.27872400  |
| C | 5.70112400  | -0.04527500 | -0.02401700 |
| C | 5.37378500  | 0.27335900  | -1.46108700 |
| C | 2.48662600  | -0.76139600 | -0.90434900 |
| C | 2.20906200  | -0.26250100 | -2.19608900 |
| C | 1.94388400  | 1.18769300  | -2.50851300 |
| C | 2.16091900  | -1.17249800 | -3.26306400 |
| C | 2.34124700  | -2.54691700 | -3.09346700 |
| C | 2.53978900  | -3.01960300 | -1.79274100 |

|   |             |             |             |
|---|-------------|-------------|-------------|
| C | 2.59771100  | -2.15927900 | -0.69318500 |
| C | 2.75257000  | -2.76050600 | 0.68321900  |
| C | 2.23916500  | -3.50519900 | -4.24940000 |
| H | 4.95983600  | 2.49451600  | 0.47344700  |
| H | 4.82170600  | 4.97337600  | 0.33855500  |
| H | 2.62232700  | 6.08867400  | 0.15612600  |
| H | -2.29766100 | 5.55969700  | 1.27648600  |
| H | -4.01711900 | 4.01605400  | 2.16103600  |
| H | -3.68235800 | 1.56728800  | 2.01042100  |
| H | -0.95837700 | 6.75493600  | 0.23907200  |
| H | 0.74709600  | 6.94174700  | -0.15050600 |
| H | 0.26992500  | 6.43404600  | 1.49330000  |
| H | -1.23624900 | 5.21124600  | -1.73187000 |
| H | 0.50573100  | 5.35095600  | -2.12694800 |
| H | -0.24644100 | 3.74660500  | -1.89527200 |
| H | 4.71882500  | -0.71133800 | 4.42578700  |
| H | 3.77346200  | 0.60896000  | 3.70525100  |
| H | 3.35624500  | -1.06895500 | 3.34181000  |
| H | 6.80683500  | -0.90800000 | 3.60981800  |
| H | 9.54543700  | -0.82829700 | 0.99725200  |
| H | 9.28218900  | -0.42141600 | 2.71281100  |
| H | 8.99884900  | -2.07491400 | 2.14286600  |
| H | 7.77171600  | -0.33043700 | -0.53199200 |
| H | 6.28505200  | 0.56380800  | -2.00303500 |
| H | 4.65185900  | 1.09311500  | -1.55392300 |
| H | 4.93969800  | -0.59730200 | -1.97469800 |
| H | 1.71636000  | 1.30969100  | -3.57603200 |
| H | 1.08217100  | 1.55957100  | -1.94077800 |
| H | 2.79679800  | 1.83740400  | -2.26587800 |
| H | 1.94891600  | -0.78629500 | -4.26335300 |
| H | 2.62730400  | -4.09569900 | -1.62224900 |
| H | 2.69516400  | -3.85636400 | 0.63292500  |
| H | 1.94976000  | -2.41572200 | 1.35342600  |
| H | 3.71642800  | -2.49745800 | 1.14631500  |
| H | 1.29470500  | -4.06941400 | -4.18990400 |
| H | 2.25385300  | -2.97963100 | -5.21467000 |
| H | 3.06275100  | -4.23639600 | -4.23752100 |

---



**Table S19**  
**B/Sb-TS**

---

Atomic Coordinates (Angstroms)

| Number | X           | Y           | Z           |
|--------|-------------|-------------|-------------|
| Sb     | 2.66739100  | 0.15063600  | 0.78461300  |
| N      | 1.31698200  | 1.01449000  | 3.09629500  |
| N      | 0.31514200  | 0.55822300  | 2.78194300  |
| O      | -0.19423800 | -0.22554200 | 1.96686300  |
| B      | -1.67057800 | 0.18375100  | 1.07470900  |
| C      | -1.80687900 | 1.77466600  | 1.15159700  |
| C      | -0.82136200 | 2.67629300  | 0.70616000  |
| O      | 0.38368700  | 2.13315100  | 0.29146500  |
| C      | 1.50854500  | 2.92604900  | 0.28544600  |
| C      | 2.73959900  | 2.26679600  | 0.38735000  |
| C      | 3.91011100  | 3.02960000  | 0.42381700  |
| C      | 3.83749700  | 4.42271800  | 0.33488000  |
| C      | 2.59867000  | 5.05359300  | 0.20314800  |
| C      | 1.40707400  | 4.31648500  | 0.16615100  |
| C      | 0.02797100  | 4.91695100  | -0.09186800 |
| C      | -1.00784400 | 4.06403500  | 0.64390200  |
| C      | -2.21286800 | 4.57768500  | 1.13986800  |
| C      | -3.20028900 | 3.72942900  | 1.63693100  |
| C      | -2.99931400 | 2.34896000  | 1.62211500  |
| C      | -0.03712900 | 6.39385800  | 0.31458700  |
| C      | -0.26750400 | 4.79561700  | -1.61174500 |
| C      | -1.24733500 | -0.51699000 | -0.31930100 |
| C      | -1.31149100 | 0.09728200  | -1.57259100 |
| F      | -1.64924600 | 1.38845200  | -1.69866000 |
| C      | -1.04662800 | -0.57949700 | -2.76417700 |
| F      | -1.07473600 | 0.06490700  | -3.93147200 |
| C      | -0.71419100 | -1.93095700 | -2.73046400 |
| F      | -0.47642100 | -2.58746200 | -3.86278300 |
| C      | -0.61483500 | -2.58202900 | -1.50323600 |
| C      | -0.87817000 | -1.86737500 | -0.33710400 |
| F      | -0.77877700 | -2.55136700 | 0.81538400  |

|   |             |             |             |
|---|-------------|-------------|-------------|
| F | -0.26178000 | -3.86627800 | -1.45314000 |
| C | -2.83250800 | -0.62334800 | 1.85852400  |
| C | -3.86737300 | -1.27343900 | 1.17831400  |
| F | -3.93077600 | -1.23807500 | -0.15994900 |
| C | -4.89145900 | -1.96767000 | 1.82738700  |
| F | -5.85200600 | -2.57125800 | 1.13088400  |
| C | -4.90631500 | -2.01875200 | 3.22117700  |
| F | -5.87166500 | -2.67387900 | 3.85750700  |
| C | -3.90597000 | -1.36654400 | 3.94331500  |
| C | -2.90573200 | -0.68024700 | 3.25336000  |
| F | -1.99534400 | -0.04042800 | 4.00498200  |
| F | -3.92017300 | -1.39586000 | 5.27455500  |
| C | 4.79630500  | -0.20876600 | 1.10523300  |
| C | 5.20108100  | -0.61379800 | 2.40023900  |
| C | 4.22518300  | -0.77474200 | 3.54366800  |
| C | 6.55430000  | -0.87579300 | 2.63980400  |
| C | 7.52291300  | -0.74767000 | 1.63701900  |
| C | 8.97342500  | -1.03058800 | 1.93161300  |
| C | 7.10020100  | -0.34932800 | 0.36801100  |
| C | 5.75261800  | -0.08215100 | 0.07400500  |
| C | 5.40821900  | 0.30272800  | -1.34386900 |
| C | 2.43883900  | -0.88019400 | -1.12366500 |
| C | 2.20330400  | -0.26514800 | -2.37033900 |
| C | 1.89238500  | 1.19993600  | -2.53579500 |
| C | 2.25110800  | -1.06128900 | -3.52466200 |
| C | 2.49488600  | -2.43604200 | -3.47855700 |
| C | 2.66360800  | -3.02859500 | -2.22294500 |
| C | 2.62606200  | -2.27908700 | -1.04257200 |
| C | 2.75350900  | -2.99803400 | 0.27987000  |
| C | 2.50439000  | -3.27440000 | -4.72858700 |
| H | 4.87861600  | 2.53858400  | 0.53711500  |
| H | 4.75153800  | 5.01980600  | 0.36660400  |
| H | 2.56260200  | 6.13992100  | 0.12021000  |
| H | -2.39218200 | 5.65266800  | 1.11987100  |
| H | -4.13587100 | 4.14429900  | 2.01803800  |
| H | -3.79534700 | 1.69408700  | 1.97981700  |
| H | -1.02529200 | 6.81814300  | 0.09009800  |
| H | 0.69172800  | 6.98720100  | -0.25507700 |

|   |             |             |             |
|---|-------------|-------------|-------------|
| H | 0.16537200  | 6.52822700  | 1.38771000  |
| H | -1.26126400 | 5.21200900  | -1.83811600 |
| H | 0.48977300  | 5.34288200  | -2.19483100 |
| H | -0.26421900 | 3.74458500  | -1.93371400 |
| H | 4.73610700  | -1.15076600 | 4.44106400  |
| H | 3.74248100  | 0.17838100  | 3.80980800  |
| H | 3.41885400  | -1.48495100 | 3.29843700  |
| H | 6.86172500  | -1.18736700 | 3.64239400  |
| H | 9.59930000  | -0.91434900 | 1.03512700  |
| H | 9.36112600  | -0.34889400 | 2.70679100  |
| H | 9.10890500  | -2.05691500 | 2.31050800  |
| H | 7.84013400  | -0.24363100 | -0.43052200 |
| H | 6.30142500  | 0.66383900  | -1.87345500 |
| H | 4.64784100  | 1.09205800  | -1.39213000 |
| H | 5.01042700  | -0.55824700 | -1.90228700 |
| H | 1.62288100  | 1.41908600  | -3.57769300 |
| H | 1.04898200  | 1.50187300  | -1.90281100 |
| H | 2.74556200  | 1.83919900  | -2.26369100 |
| H | 2.06694400  | -0.58684600 | -4.49209900 |
| H | 2.80682100  | -4.11034200 | -2.15574600 |
| H | 2.82670700  | -4.08360700 | 0.12886300  |
| H | 1.87070300  | -2.81459300 | 0.91393300  |
| H | 3.64964500  | -2.68168800 | 0.83861800  |
| H | 1.59098600  | -3.88885800 | -4.78128900 |
| H | 2.54043700  | -2.65129000 | -5.63374300 |
| H | 3.36571000  | -3.96063900 | -4.74539100 |

**Table S20**  
**B/Bi-TS**

| Atomic Coordinates (Angstroms) |             |             |            |
|--------------------------------|-------------|-------------|------------|
| Number                         | X           | Y           | Z          |
| Bi                             | 2.64352100  | 0.11997400  | 0.86418100 |
| N                              | 1.27558000  | 1.00608500  | 3.20688800 |
| N                              | 0.26289900  | 0.61691300  | 2.83632600 |
| O                              | -0.19662200 | -0.13446700 | 1.94532800 |

|   |             |             |             |
|---|-------------|-------------|-------------|
| B | -1.61981100 | 0.21035300  | 1.13931000  |
| C | -1.80098800 | 1.80527900  | 1.17595900  |
| C | -0.82756000 | 2.70967200  | 0.71150200  |
| O | 0.38246900  | 2.17004900  | 0.30564100  |
| C | 1.50040100  | 2.97416200  | 0.28760900  |
| C | 2.73554900  | 2.33120400  | 0.40986000  |
| C | 3.90154700  | 3.09767600  | 0.42980400  |
| C | 3.81711300  | 4.48920600  | 0.30870700  |
| C | 2.57305500  | 5.10748000  | 0.16267800  |
| C | 1.38640600  | 4.36097600  | 0.13891600  |
| C | 0.00078100  | 4.94182800  | -0.13179200 |
| C | -1.02649700 | 4.09425200  | 0.62313500  |
| C | -2.23483800 | 4.60448200  | 1.11451700  |
| C | -3.20987600 | 3.75457900  | 1.63377800  |
| C | -2.99587600 | 2.37559300  | 1.64301300  |
| C | -0.07920300 | 6.42637500  | 0.24242100  |
| C | -0.29354600 | 4.78372900  | -1.64847100 |
| C | -1.24318100 | -0.51557500 | -0.26715600 |
| C | -1.33111900 | 0.07287400  | -1.53090300 |
| F | -1.66326500 | 1.36259400  | -1.67472300 |
| C | -1.08979900 | -0.62954900 | -2.71274400 |
| F | -1.13881600 | -0.01024600 | -3.89272600 |
| C | -0.75790200 | -1.98111400 | -2.65753000 |
| F | -0.53960600 | -2.66025600 | -3.78062300 |
| C | -0.63692900 | -2.60711500 | -1.41957700 |
| C | -0.87586600 | -1.86621000 | -0.26364200 |
| F | -0.73747800 | -2.52221400 | 0.90290100  |
| F | -0.27809800 | -3.88891600 | -1.34756100 |
| C | -2.80810200 | -0.59889200 | 1.89217600  |
| C | -3.97095500 | -0.90604100 | 1.17848900  |
| F | -4.09743600 | -0.50348100 | -0.09497100 |
| C | -5.04992400 | -1.60018100 | 1.72799900  |
| F | -6.13444900 | -1.86429300 | 1.00236600  |
| C | -4.98316700 | -2.01548900 | 3.05884900  |
| F | -5.99723300 | -2.67938600 | 3.60514300  |
| C | -3.84990700 | -1.71681900 | 3.81509200  |
| C | -2.79660100 | -1.01395800 | 3.22441900  |
| F | -1.75016600 | -0.73854700 | 4.02170100  |

|   |             |             |             |
|---|-------------|-------------|-------------|
| F | -3.78314100 | -2.09710100 | 5.08984800  |
| C | 4.88667500  | -0.22627100 | 1.16888900  |
| C | 5.30891100  | -0.61515600 | 2.45916500  |
| C | 4.34214900  | -0.78438800 | 3.60915900  |
| C | 6.67068300  | -0.84936700 | 2.68213900  |
| C | 7.62179200  | -0.70652600 | 1.66389300  |
| C | 9.08209000  | -0.95807800 | 1.93961100  |
| C | 7.17471000  | -0.32333900 | 0.39797100  |
| C | 5.81731700  | -0.08380700 | 0.12131300  |
| C | 5.43266500  | 0.28524700  | -1.29052100 |
| C | 2.41224400  | -0.96012500 | -1.14385700 |
| C | 2.16937600  | -0.32725100 | -2.37625900 |
| C | 1.86040600  | 1.14060200  | -2.51649900 |
| C | 2.21131400  | -1.11398000 | -3.53822300 |
| C | 2.45780100  | -2.48915700 | -3.50371300 |
| C | 2.64367100  | -3.09249900 | -2.25533600 |
| C | 2.61367400  | -2.35286200 | -1.06696400 |
| C | 2.76073100  | -3.07439900 | 0.25191800  |
| C | 2.45030300  | -3.31588500 | -4.76178200 |
| H | 4.87409200  | 2.61573800  | 0.55392000  |
| H | 4.72607300  | 5.09479600  | 0.32760600  |
| H | 2.52910700  | 6.19166300  | 0.05730200  |
| H | -2.42624500 | 5.67689900  | 1.07506500  |
| H | -4.14703900 | 4.16699300  | 2.01379800  |
| H | -3.78100500 | 1.72090000  | 2.02431400  |
| H | -1.07176800 | 6.83554900  | 0.00921700  |
| H | 0.64392800  | 7.01433700  | -0.34008400 |
| H | 0.12200000  | 6.58608500  | 1.31232500  |
| H | -1.29183500 | 5.18404400  | -1.88371500 |
| H | 0.45771100  | 5.32602900  | -2.24387500 |
| H | -0.27888100 | 3.72578100  | -1.94675100 |
| H | 4.86295400  | -1.13280300 | 4.51197600  |
| H | 3.83532700  | 0.16031400  | 3.86278000  |
| H | 3.55542800  | -1.52191700 | 3.37838900  |
| H | 6.99861600  | -1.14918600 | 3.68201900  |
| H | 9.69177300  | -0.84067600 | 1.03216500  |
| H | 9.46867600  | -0.25940700 | 2.70014300  |
| H | 9.24371100  | -1.97685800 | 2.32842600  |

|   |            |             |             |
|---|------------|-------------|-------------|
| H | 7.90161200 | -0.20819100 | -0.41133300 |
| H | 6.31017700 | 0.63329500  | -1.85393100 |
| H | 4.67636300 | 1.08064000  | -1.32271500 |
| H | 5.00957700 | -0.57926000 | -1.82454100 |
| H | 1.55626100 | 1.37305800  | -3.54601500 |
| H | 1.04283700 | 1.44127400  | -1.85003900 |
| H | 2.72829400 | 1.77016100  | -2.26752300 |
| H | 2.02085300 | -0.63141600 | -4.50062400 |
| H | 2.79601500 | -4.17375200 | -2.19933400 |
| H | 2.88294900 | -4.15498700 | 0.09712000  |
| H | 1.86373900 | -2.93512900 | 0.87758200  |
| H | 3.63843900 | -2.72241600 | 0.81935800  |
| H | 1.48918300 | -3.84671000 | -4.86036600 |
| H | 2.57832600 | -2.69107300 | -5.65763200 |
| H | 3.24810800 | -4.07448500 | -4.75044300 |

**Table S21**  
**B/P-Prod**

Atomic Coordinates (Angstroms)

| Number | X          | Y          | Z           |
|--------|------------|------------|-------------|
| P      | 4.93232800 | 4.22651800 | -1.02283400 |
| N      | 5.95229800 | 3.84846400 | -2.34987000 |
| N      | 6.90955800 | 3.19107200 | -1.84667400 |
| O      | 7.93021300 | 3.06315000 | -2.60762300 |
| B      | 9.22076800 | 2.80564800 | -1.76518600 |
| C      | 9.82945800 | 4.30532900 | -1.54872800 |
| C      | 9.14679400 | 5.33468400 | -0.87879200 |
| O      | 7.85221000 | 5.05795700 | -0.41037100 |
| C      | 6.96807500 | 6.06942200 | -0.25996100 |
| C      | 5.58300300 | 5.80724200 | -0.40882700 |
| C      | 4.67101200 | 6.86086000 | -0.21015400 |
| C      | 5.11985500 | 8.13335300 | 0.12263300  |
| C      | 6.49022600 | 8.37287200 | 0.25860000  |
| C      | 7.42875500 | 7.35401000 | 0.08292600  |
| C      | 8.92382100 | 7.51730400 | 0.34776800  |

|   |             |             |             |
|---|-------------|-------------|-------------|
| C | 9.67915600  | 6.60172500  | -0.61641600 |
| C | 10.94006000 | 6.89847800  | -1.14622200 |
| C | 11.63559400 | 5.93546200  | -1.87549600 |
| C | 11.09041100 | 4.66276100  | -2.05239900 |
| C | 9.36765400  | 8.97974400  | 0.23471600  |
| C | 9.20669600  | 7.01405500  | 1.79036400  |
| C | 8.79026400  | 2.00783400  | -0.39226800 |
| C | 9.09257500  | 2.38781600  | 0.91481800  |
| F | 9.77565700  | 3.51267100  | 1.17997000  |
| C | 8.69009700  | 1.65930400  | 2.03823300  |
| F | 8.94156700  | 2.11192300  | 3.27083000  |
| C | 7.98214800  | 0.47503400  | 1.86914000  |
| F | 7.56526900  | -0.21755600 | 2.93324800  |
| C | 7.66323200  | 0.04721000  | 0.58188500  |
| C | 8.06278600  | 0.81788400  | -0.50698200 |
| F | 7.68744800  | 0.37989100  | -1.71907200 |
| F | 6.94455400  | -1.06901100 | 0.41245700  |
| C | 10.21539600 | 1.83789300  | -2.62011600 |
| C | 11.38161900 | 1.37272600  | -2.00354100 |
| F | 11.67778900 | 1.77392000  | -0.75567500 |
| C | 12.29363900 | 0.51365200  | -2.61686900 |
| F | 13.39301500 | 0.10792600  | -1.97954600 |
| C | 12.03942200 | 0.07642200  | -3.91750600 |
| F | 12.89097200 | -0.74640300 | -4.52763100 |
| C | 10.89140300 | 0.51529100  | -4.57491800 |
| C | 10.00548900 | 1.38114900  | -3.92346000 |
| F | 8.93237100  | 1.75575200  | -4.62741100 |
| F | 10.64556400 | 0.10450700  | -5.82041300 |
| C | 3.25182000  | 4.57112200  | -1.62939600 |
| C | 3.04091200  | 5.01171600  | -2.96448000 |
| C | 4.14129900  | 5.36608200  | -3.93537800 |
| C | 1.72228100  | 5.16874000  | -3.40772000 |
| C | 0.61590900  | 4.93927900  | -2.58569500 |
| C | -0.78623600 | 5.07089300  | -3.11641800 |
| C | 0.85661600  | 4.59654100  | -1.25261200 |
| C | 2.14872600  | 4.41824300  | -0.74639000 |
| C | 2.26890300  | 4.11656800  | 0.73087600  |
| C | 4.89173300  | 2.81305500  | 0.12415600  |

|   |             |             |             |
|---|-------------|-------------|-------------|
| C | 5.34417200  | 2.86107300  | 1.46454200  |
| C | 6.03894700  | 4.04186900  | 2.09360600  |
| C | 5.16486600  | 1.72554900  | 2.26424500  |
| C | 4.59126200  | 0.54660500  | 1.78392000  |
| C | 4.19885800  | 0.51314600  | 0.44240400  |
| C | 4.33172100  | 1.61573400  | -0.40389400 |
| C | 3.84800300  | 1.46277200  | -1.82783400 |
| C | 4.46846900  | -0.67684500 | 2.64875900  |
| H | 3.60427900  | 6.68258000  | -0.34336500 |
| H | 4.40309600  | 8.94310400  | 0.27053500  |
| H | 6.82919500  | 9.37452800  | 0.52265900  |
| H | 11.39107300 | 7.87615400  | -0.97629600 |
| H | 12.61767900 | 6.17224200  | -2.29143300 |
| H | 11.66440800 | 3.91930300  | -2.60731900 |
| H | 10.44125800 | 9.07266700  | 0.44628500  |
| H | 8.85001200  | 9.60755800  | 0.97408800  |
| H | 9.17541400  | 9.38680300  | -0.76934600 |
| H | 10.27911700 | 7.11586800  | 2.01544500  |
| H | 8.63121300  | 7.60014200  | 2.52459100  |
| H | 8.94639000  | 5.95225800  | 1.90175500  |
| H | 3.72366500  | 5.95125900  | -4.76640100 |
| H | 4.93915200  | 5.95303500  | -3.46117600 |
| H | 4.63348400  | 4.47363700  | -4.34386300 |
| H | 1.56018600  | 5.49987100  | -4.43662600 |
| H | -1.50150500 | 5.31294400  | -2.31675800 |
| H | -0.85284400 | 5.84833600  | -3.89200400 |
| H | -1.11475800 | 4.12290300  | -3.57627500 |
| H | 0.01019100  | 4.47670500  | -0.57144200 |
| H | 1.35651800  | 4.44687100  | 1.24709200  |
| H | 3.11771100  | 4.62952100  | 1.20191200  |
| H | 2.39472400  | 3.04179000  | 0.92671000  |
| H | 6.27447700  | 3.82030800  | 3.14262000  |
| H | 6.98756000  | 4.24982300  | 1.58185800  |
| H | 5.43576200  | 4.96081800  | 2.06795700  |
| H | 5.52200400  | 1.75734600  | 3.29580200  |
| H | 3.78416900  | -0.41078300 | 0.03222100  |
| H | 3.74082500  | 0.39719200  | -2.07136600 |
| H | 4.53924600  | 1.90118500  | -2.55861800 |



|   |            |             |             |
|---|------------|-------------|-------------|
| H | 2.86697200 | 1.94077700  | -1.97501600 |
| H | 3.50826700 | -1.18928300 | 2.48380900  |
| H | 5.27286500 | -1.38677800 | 2.39988600  |
| H | 4.55909400 | -0.43084300 | 3.71592300  |

**Table S22**  
**Al/P-Prod**

Atomic Coordinates (Angstroms)

| Number | X           | Y          | Z           |
|--------|-------------|------------|-------------|
| P      | 4.90315500  | 4.26102800 | -1.05031300 |
| N      | 5.82419200  | 3.79640400 | -2.42339900 |
| N      | 6.79288900  | 3.10595400 | -2.00226300 |
| O      | 7.66397200  | 2.78811100 | -2.89399900 |
| Al     | 9.25659700  | 2.61751700 | -1.90830600 |
| C      | 9.87031100  | 4.48466900 | -1.64273900 |
| C      | 9.15520600  | 5.46811200 | -0.94965600 |
| O      | 7.84067100  | 5.14290700 | -0.56206100 |
| C      | 6.94766000  | 6.12792500 | -0.33093300 |
| C      | 5.56483900  | 5.84751000 | -0.46699200 |
| C      | 4.63528400  | 6.87337600 | -0.20911100 |
| C      | 5.06246600  | 8.13787000 | 0.17545300  |
| C      | 6.42896800  | 8.39160300 | 0.31798900  |
| C      | 7.38522700  | 7.40097500 | 0.08614200  |
| C      | 8.87216500  | 7.58459800 | 0.38202700  |
| C      | 9.66263600  | 6.72439000 | -0.60153800 |
| C      | 10.94078800 | 7.05275200 | -1.07221800 |
| C      | 11.67858100 | 6.13443500 | -1.81919300 |
| C      | 11.15439200 | 4.86439500 | -2.07425600 |
| C      | 9.28892700  | 9.05910400 | 0.33636500  |
| C      | 9.13915700  | 7.02811300 | 1.80825600  |
| C      | 8.74960800  | 1.69935400 | -0.19427200 |
| C      | 8.95011900  | 2.22023000 | 1.08013600  |
| F      | 9.55293000  | 3.41335800 | 1.24906900  |
| C      | 8.51791100  | 1.58243100 | 2.24400000  |
| F      | 8.65858100  | 2.15493200 | 3.44517200  |

|   |             |             |             |
|---|-------------|-------------|-------------|
| C | 7.86668900  | 0.35551100  | 2.13946800  |
| F | 7.40793600  | -0.24887400 | 3.23889200  |
| C | 7.63256900  | -0.20275600 | 0.88342300  |
| C | 8.07716000  | 0.48150900  | -0.24763600 |
| F | 7.80556100  | -0.07351900 | -1.44347100 |
| F | 6.94895100  | -1.34908000 | 0.78510000  |
| C | 10.55353000 | 1.52497700  | -2.95464800 |
| C | 11.75122700 | 1.17101200  | -2.33856100 |
| F | 11.99906100 | 1.60662300  | -1.08644900 |
| C | 12.73058300 | 0.38612900  | -2.94852400 |
| F | 13.86560700 | 0.07164100  | -2.32244400 |
| C | 12.50170800 | -0.07293300 | -4.24826300 |
| F | 13.41595800 | -0.82347700 | -4.85894700 |
| C | 11.31600300 | 0.25813000  | -4.90847300 |
| C | 10.36953400 | 1.04839600  | -4.25006000 |
| F | 9.24804800  | 1.34239800  | -4.92369600 |
| F | 11.10737500 | -0.18259500 | -6.15021500 |
| C | 3.21179100  | 4.61551400  | -1.62608000 |
| C | 2.99686700  | 5.09339700  | -2.94806700 |
| C | 4.09441400  | 5.50190600  | -3.90177900 |
| C | 1.67741900  | 5.24642800  | -3.38930500 |
| C | 0.57319300  | 4.98244400  | -2.57456300 |
| C | -0.82971600 | 5.10952500  | -3.10430700 |
| C | 0.81741600  | 4.61591600  | -1.24858000 |
| C | 2.11123800  | 4.43970200  | -0.74485300 |
| C | 2.23149700  | 4.12414600  | 0.72983300  |
| C | 4.86483600  | 2.86494200  | 0.11842700  |
| C | 5.35466300  | 2.92545700  | 1.44582000  |
| C | 6.10999800  | 4.09358600  | 2.02668500  |
| C | 5.15036300  | 1.81791400  | 2.27767000  |
| C | 4.52064700  | 0.65027300  | 1.84019900  |
| C | 4.10238900  | 0.59774200  | 0.50738800  |
| C | 4.24904300  | 1.67705600  | -0.36750600 |
| C | 3.69174400  | 1.50908500  | -1.76339300 |
| C | 4.35175300  | -0.53998000 | 2.74354100  |
| H | 3.57056100  | 6.67933600  | -0.33275500 |
| H | 4.33264800  | 8.92671600  | 0.36571800  |
| H | 6.75236200  | 9.38288700  | 0.63496500  |

|   |             |             |             |
|---|-------------|-------------|-------------|
| H | 11.37517000 | 8.02476700  | -0.83763600 |
| H | 12.67441200 | 6.40305800  | -2.17994300 |
| H | 11.76529700 | 4.14380000  | -2.62517900 |
| H | 10.35732400 | 9.16316700  | 0.56790500  |
| H | 8.74996200  | 9.64685900  | 1.09307900  |
| H | 9.10348900  | 9.50345900  | -0.65306100 |
| H | 10.20484000 | 7.14206000  | 2.05848000  |
| H | 8.53780600  | 7.57125000  | 2.55474800  |
| H | 8.89824800  | 5.95750700  | 1.87130400  |
| H | 3.67579800  | 6.14624100  | -4.68751800 |
| H | 4.89840800  | 6.05329000  | -3.39548500 |
| H | 4.57568800  | 4.63455100  | -4.37191700 |
| H | 1.51259400  | 5.60500700  | -4.40862200 |
| H | -1.55364500 | 5.29212000  | -2.29671300 |
| H | -0.91136200 | 5.92565400  | -3.83786300 |
| H | -1.13374600 | 4.18037200  | -3.61656600 |
| H | -0.02788000 | 4.47667400  | -0.56969300 |
| H | 1.32027800  | 4.45445100  | 1.24817500  |
| H | 3.08263400  | 4.62953200  | 1.20434100  |
| H | 2.35213900  | 3.04763800  | 0.91913900  |
| H | 6.40806200  | 3.86884300  | 3.05869800  |
| H | 7.02844800  | 4.28456700  | 1.45764200  |
| H | 5.52125600  | 5.02245700  | 2.03666000  |
| H | 5.53047500  | 1.86184300  | 3.30048000  |
| H | 3.64059300  | -0.31824700 | 0.13029400  |
| H | 3.65582300  | 0.44153400  | -2.02073200 |
| H | 4.28466500  | 2.01483900  | -2.53441900 |
| H | 2.66514100  | 1.90335800  | -1.82926500 |
| H | 3.35949100  | -0.99916500 | 2.61508900  |
| H | 5.10632300  | -1.30372100 | 2.49957400  |
| H | 4.48179100  | -0.26897600 | 3.80025500  |

-----

**Table S23**  
**Ga/P-Prod**

-----

Atomic Coordinates (Angstroms)

| Number | X | Y | Z |
|--------|---|---|---|
|--------|---|---|---|

---

|    |             |             |             |
|----|-------------|-------------|-------------|
| P  | 4.93456100  | 4.21534000  | -1.04249900 |
| N  | 5.86381400  | 3.72353000  | -2.38862200 |
| N  | 6.84499700  | 3.05320300  | -1.94101300 |
| O  | 7.71695200  | 2.72918900  | -2.81496000 |
| Ga | 9.40249100  | 2.59967500  | -1.75112300 |
| C  | 9.93527200  | 4.50604700  | -1.56638700 |
| C  | 9.17821300  | 5.48825300  | -0.91780100 |
| O  | 7.86841500  | 5.15032900  | -0.53860700 |
| C  | 6.95380000  | 6.12774100  | -0.34473200 |
| C  | 5.57628400  | 5.82270100  | -0.48524200 |
| C  | 4.63061800  | 6.84144300  | -0.26202000 |
| C  | 5.03319700  | 8.12294400  | 0.09195200  |
| C  | 6.39345800  | 8.40164600  | 0.23788600  |
| C  | 7.36595900  | 7.41901300  | 0.04075600  |
| C  | 8.84613400  | 7.63818600  | 0.34311200  |
| C  | 9.65909500  | 6.76680600  | -0.61092400 |
| C  | 10.93085000 | 7.11172700  | -1.08619700 |
| C  | 11.69740700 | 6.18946600  | -1.79795900 |
| C  | 11.20960200 | 4.89738800  | -2.00728800 |
| C  | 9.23751600  | 9.11809800  | 0.26207100  |
| C  | 9.11199600  | 7.12461400  | 1.78561500  |
| C  | 8.81381800  | 1.71926000  | -0.04104300 |
| C  | 8.96250100  | 2.29415800  | 1.21532100  |
| F  | 9.54417000  | 3.50128900  | 1.35733700  |
| C  | 8.50281100  | 1.68943000  | 2.38637300  |
| F  | 8.59730300  | 2.30576800  | 3.57010000  |
| C  | 7.87617800  | 0.44886200  | 2.30371100  |
| F  | 7.39408700  | -0.12605900 | 3.40843800  |
| C  | 7.69255500  | -0.15731300 | 1.06105700  |
| C  | 8.16455400  | 0.48896200  | -0.08072100 |
| F  | 7.95431400  | -0.11690500 | -1.25994400 |
| F  | 7.03238500  | -1.31805800 | 0.98421600  |
| C  | 10.61031000 | 1.49692200  | -2.90354800 |
| C  | 11.19760100 | 0.30795900  | -2.47860700 |
| F  | 11.01081800 | -0.13221100 | -1.22379400 |
| C  | 12.00367900 | -0.47563500 | -3.30823300 |
| F  | 12.55062300 | -1.61010800 | -2.87015400 |

|   |             |             |             |
|---|-------------|-------------|-------------|
| C | 12.23901900 | -0.05412100 | -4.61883500 |
| F | 13.00562200 | -0.78431700 | -5.42499300 |
| C | 11.67351000 | 1.13627600  | -5.08209300 |
| C | 10.87343000 | 1.88379700  | -4.21537800 |
| F | 10.35071600 | 3.02457500  | -4.69315100 |
| F | 11.90543500 | 1.53722900  | -6.33256800 |
| C | 3.24529000  | 4.54769100  | -1.64190900 |
| C | 3.04321500  | 4.99406800  | -2.97713300 |
| C | 4.14949200  | 5.39054100  | -3.92584800 |
| C | 1.72842000  | 5.12741500  | -3.43831300 |
| C | 0.61568800  | 4.87359600  | -2.63197100 |
| C | -0.78111500 | 4.97878900  | -3.18250900 |
| C | 0.84571500  | 4.53907900  | -1.29524600 |
| C | 2.13451300  | 4.38432800  | -0.77138400 |
| C | 2.23671100  | 4.10435300  | 0.71187900  |
| C | 4.88546300  | 2.85385300  | 0.16838400  |
| C | 5.35203100  | 2.95627700  | 1.50112300  |
| C | 6.08559400  | 4.14887300  | 2.06032700  |
| C | 5.14454800  | 1.87126100  | 2.36167800  |
| C | 4.53459700  | 0.68489500  | 1.94740800  |
| C | 4.13716600  | 0.59137600  | 0.61054400  |
| C | 4.28709200  | 1.64712200  | -0.29225100 |
| C | 3.75130600  | 1.43574700  | -1.69058500 |
| C | 4.36446200  | -0.48266600 | 2.87993600  |
| H | 3.57024300  | 6.62820000  | -0.39017400 |
| H | 4.28904900  | 8.90457800  | 0.25452900  |
| H | 6.69963400  | 9.40594200  | 0.52964800  |
| H | 11.33754300 | 8.10247800  | -0.88325400 |
| H | 12.68657000 | 6.47199000  | -2.16592100 |
| H | 11.83890500 | 4.17154900  | -2.52893500 |
| H | 10.30196600 | 9.24720700  | 0.49922200  |
| H | 8.68231400  | 9.71528200  | 0.99924900  |
| H | 9.05202400  | 9.53361800  | -0.73976400 |
| H | 10.17390900 | 7.26193800  | 2.04038400  |
| H | 8.49681800  | 7.67877100  | 2.51239300  |
| H | 8.88580700  | 6.05281300  | 1.87674600  |
| H | 3.73477100  | 6.00815600  | -4.73485000 |
| H | 4.93892100  | 5.96525000  | -3.42241600 |

|   |             |             |             |
|---|-------------|-------------|-------------|
| H | 4.64990100  | 4.51701200  | -4.36300500 |
| H | 1.57414400  | 5.46182000  | -4.46749100 |
| H | -1.51890100 | 5.15718900  | -2.38656000 |
| H | -0.86269800 | 5.78937700  | -3.92241100 |
| H | -1.06580400 | 4.04279300  | -3.69354100 |
| H | -0.00711400 | 4.40872100  | -0.62402300 |
| H | 1.31605300  | 4.44001900  | 1.20977200  |
| H | 3.07764900  | 4.62699500  | 1.18568900  |
| H | 2.36242100  | 3.03360500  | 0.92843300  |
| H | 6.37255900  | 3.95582200  | 3.10184800  |
| H | 7.00899100  | 4.33699100  | 1.49835600  |
| H | 5.48546800  | 5.07022400  | 2.03755100  |
| H | 5.50659600  | 1.94878800  | 3.38903200  |
| H | 3.68899800  | -0.33901100 | 0.25263100  |
| H | 3.70889700  | 0.36039400  | -1.91191100 |
| H | 4.36251400  | 1.91163500  | -2.46637700 |
| H | 2.72986600  | 1.83693600  | -1.78733300 |
| H | 3.37784500  | -0.95391500 | 2.75143800  |
| H | 5.12859400  | -1.24602800 | 2.66585800  |
| H | 4.47866500  | -0.18291000 | 3.93071100  |

**Table S24**  
**In/P-Prod**

Atomic Coordinates (Angstroms)

| Number | X          | Y          | Z           |
|--------|------------|------------|-------------|
| P      | 4.93490200 | 4.29627200 | -1.10276800 |
| N      | 5.82189700 | 3.86006100 | -2.48446800 |
| N      | 6.81513400 | 3.14971000 | -2.11685500 |
| O      | 7.61225200 | 2.82392400 | -3.05026400 |
| In     | 9.47024200 | 2.59356100 | -1.84406900 |
| C      | 9.98427400 | 4.69415500 | -1.58137300 |
| C      | 9.18718700 | 5.61699200 | -0.89363100 |
| O      | 7.87406900 | 5.23695100 | -0.56919100 |
| C      | 6.94519500 | 6.18860000 | -0.30756000 |
| C      | 5.57101400 | 5.87842100 | -0.46856800 |

|   |             |             |             |
|---|-------------|-------------|-------------|
| C | 4.61382400  | 6.87035800  | -0.18354200 |
| C | 4.99831600  | 8.13142600  | 0.25354500  |
| C | 6.35373100  | 8.41267600  | 0.42722900  |
| C | 7.33768000  | 7.45499000  | 0.17111100  |
| C | 8.80968600  | 7.67219500  | 0.50660900  |
| C | 9.64385800  | 6.88115600  | -0.49629900 |
| C | 10.91414800 | 7.28132300  | -0.92963700 |
| C | 11.71256700 | 6.42176500  | -1.68225200 |
| C | 11.26025600 | 5.13204700  | -1.97199500 |
| C | 9.18271300  | 9.15889500  | 0.53637500  |
| C | 9.06676400  | 7.06178000  | 1.91267400  |
| C | 8.78700600  | 1.60376600  | 0.00656200  |
| C | 8.88644700  | 2.20251900  | 1.25534900  |
| F | 9.41969600  | 3.43419500  | 1.38432700  |
| C | 8.42393100  | 1.59415400  | 2.42233000  |
| F | 8.46315000  | 2.22491200  | 3.60145200  |
| C | 7.84737700  | 0.32778800  | 2.33902400  |
| F | 7.35537300  | -0.24878300 | 3.43763900  |
| C | 7.72073100  | -0.30243700 | 1.10132700  |
| C | 8.19258000  | 0.34904100  | -0.03971600 |
| F | 8.04126100  | -0.27906300 | -1.21627600 |
| F | 7.11690600  | -1.49318000 | 1.02552900  |
| C | 10.73324000 | 1.29487400  | -3.08430100 |
| C | 12.11537400 | 1.32398100  | -2.95611500 |
| F | 12.68877800 | 2.19273900  | -2.09611200 |
| C | 12.96429300 | 0.48485300  | -3.67990900 |
| F | 14.28879300 | 0.54107900  | -3.53593900 |
| C | 12.39876400 | -0.43490300 | -4.56685800 |
| F | 13.18260200 | -1.24916200 | -5.26910200 |
| C | 11.01111900 | -0.49994100 | -4.71749200 |
| C | 10.20339500 | 0.36347000  | -3.97154500 |
| F | 8.87895800  | 0.26322000  | -4.13875200 |
| F | 10.48134500 | -1.38273700 | -5.56437300 |
| C | 3.23542800  | 4.65173900  | -1.66637500 |
| C | 3.02035900  | 5.16177900  | -2.97665200 |
| C | 4.11563400  | 5.62026900  | -3.91036700 |
| C | 1.70153800  | 5.30364700  | -3.42405900 |
| C | 0.59615600  | 4.99885200  | -2.62564600 |

|   |             |             |             |
|---|-------------|-------------|-------------|
| C | -0.80505000 | 5.11360700  | -3.16304800 |
| C | 0.83769100  | 4.60448500  | -1.30743300 |
| C | 2.13108800  | 4.43821000  | -0.79846100 |
| C | 2.24282200  | 4.09434900  | 0.67070100  |
| C | 4.89107600  | 2.88640100  | 0.05405600  |
| C | 5.35272000  | 2.93913100  | 1.39191900  |
| C | 6.08270600  | 4.11047300  | 1.99879400  |
| C | 5.13679400  | 1.82634000  | 2.21377500  |
| C | 4.52140500  | 0.65842000  | 1.75703200  |
| C | 4.12834800  | 0.61393400  | 0.41654600  |
| C | 4.28637100  | 1.69992800  | -0.44916200 |
| C | 3.74266600  | 1.54013100  | -1.85143400 |
| C | 4.33477700  | -0.53611200 | 2.65211900  |
| H | 3.55661300  | 6.65270100  | -0.32751700 |
| H | 4.24423900  | 8.89244400  | 0.46172200  |
| H | 6.64812700  | 9.39750400  | 0.78866600  |
| H | 11.29655200 | 8.26480300  | -0.65682700 |
| H | 12.70277800 | 6.74481700  | -2.01210600 |
| H | 11.92744100 | 4.44559500  | -2.49707900 |
| H | 10.24222000 | 9.28384400  | 0.79657900  |
| H | 8.61097000  | 9.69473500  | 1.30711600  |
| H | 9.00392100  | 9.64316400  | -0.43535400 |
| H | 10.12426900 | 7.19258300  | 2.18846600  |
| H | 8.43759600  | 7.55762200  | 2.66896700  |
| H | 8.85097900  | 5.98411500  | 1.92773600  |
| H | 3.68918100  | 6.28176200  | -4.67770600 |
| H | 4.90575700  | 6.17010500  | -3.38084800 |
| H | 4.61716700  | 4.77639700  | -4.40103700 |
| H | 1.53807500  | 5.68662500  | -4.43475800 |
| H | -1.53789900 | 5.26489900  | -2.35686100 |
| H | -0.89597000 | 5.94506100  | -3.87824900 |
| H | -1.08934700 | 4.19137600  | -3.69882800 |
| H | -0.00972800 | 4.43468000  | -0.63811400 |
| H | 1.32333300  | 4.40434100  | 1.18716000  |
| H | 3.08381100  | 4.60002200  | 1.16214400  |
| H | 2.37363000  | 3.01589800  | 0.84067000  |
| H | 6.37334900  | 3.87550200  | 3.03053900  |
| H | 7.00339100  | 4.32763500  | 1.44366300  |



|   |            |             |             |
|---|------------|-------------|-------------|
| H | 5.47738100 | 5.02846800  | 2.01649200  |
| H | 5.49011800 | 1.86896000  | 3.24625200  |
| H | 3.67173800 | -0.29917900 | 0.02598500  |
| H | 3.70533100 | 0.47399500  | -2.11452200 |
| H | 4.34257000 | 2.05159800  | -2.61272100 |
| H | 2.71733200 | 1.93712900  | -1.92247500 |
| H | 3.35058700 | -1.00259100 | 2.49206000  |
| H | 5.10117700 | -1.29557300 | 2.43258300  |
| H | 4.42933200 | -0.26632700 | 3.71294000  |

-----

**Table S25**  
**TI/P-Prod**

-----

Atomic Coordinates (Angstroms)

| Number | X           | Y          | Z           |
|--------|-------------|------------|-------------|
| P      | 4.97982400  | 4.24584300 | -1.08054300 |
| N      | 5.85922600  | 3.81177500 | -2.45299200 |
| N      | 6.83121600  | 3.03984700 | -2.11695200 |
| O      | 7.60035400  | 2.72193800 | -3.06243100 |
| TI     | 9.60526100  | 2.58667700 | -1.75786800 |
| C      | 9.98043600  | 4.76195200 | -1.68472600 |
| C      | 9.17972700  | 5.66267800 | -0.97663700 |
| O      | 7.90198300  | 5.25057200 | -0.57959700 |
| C      | 6.95304800  | 6.19325600 | -0.33299600 |
| C      | 5.58549800  | 5.85262300 | -0.47012700 |
| C      | 4.61486700  | 6.83340700 | -0.19531700 |
| C      | 4.98064300  | 8.11158000 | 0.20884400  |
| C      | 6.33197500  | 8.42479100 | 0.35290200  |
| C      | 7.32920700  | 7.47894800 | 0.10283900  |
| C      | 8.80562000  | 7.73552100 | 0.38612400  |
| C      | 9.61459800  | 6.95404400 | -0.64414900 |
| C      | 10.83430600 | 7.39273700 | -1.17360000 |
| C      | 11.61208700 | 6.55008100 | -1.96712000 |
| C      | 11.19948500 | 5.23408500 | -2.19015500 |
| C      | 9.14575500  | 9.22973900 | 0.38891200  |
| C      | 9.13070100  | 7.14406000 | 1.78599200  |

|   |             |             |             |
|---|-------------|-------------|-------------|
| C | 8.78729100  | 1.63604300  | 0.10018800  |
| C | 8.94451400  | 2.23724100  | 1.33904000  |
| F | 9.55748300  | 3.43441500  | 1.44495800  |
| C | 8.46399400  | 1.66132100  | 2.51545300  |
| F | 8.56248200  | 2.28996000  | 3.69199700  |
| C | 7.80882000  | 0.43328500  | 2.44263300  |
| F | 7.30199200  | -0.11234300 | 3.55043200  |
| C | 7.61569900  | -0.18686300 | 1.20780900  |
| C | 8.10384900  | 0.42866000  | 0.05464500  |
| F | 7.88079300  | -0.18128700 | -1.11610900 |
| F | 6.92890300  | -1.33216800 | 1.14624100  |
| C | 10.83887000 | 1.23626000  | -3.04252300 |
| C | 11.12590500 | -0.07154000 | -2.66948400 |
| F | 10.71672900 | -0.55023400 | -1.48573000 |
| C | 11.85117500 | -0.93503000 | -3.49512100 |
| F | 12.11586300 | -2.18697400 | -3.12281600 |
| C | 12.31219400 | -0.46769100 | -4.72866200 |
| F | 13.00797200 | -1.27377000 | -5.52550800 |
| C | 12.04723700 | 0.84586200  | -5.12565400 |
| C | 11.31751800 | 1.67451900  | -4.27040000 |
| F | 11.08727600 | 2.93549700  | -4.67425000 |
| F | 12.49690200 | 1.28524900  | -6.30085800 |
| C | 3.26651800  | 4.56788800  | -1.63354900 |
| C | 3.02842600  | 5.02709400  | -2.95883800 |
| C | 4.10335300  | 5.47110900  | -3.92300300 |
| C | 1.70244800  | 5.13234500  | -3.39595200 |
| C | 0.61037200  | 4.84007700  | -2.57527600 |
| C | -0.79819600 | 4.91287600  | -3.10088000 |
| C | 0.87248000  | 4.49945100  | -1.24633100 |
| C | 2.17392500  | 4.37187800  | -0.74636700 |
| C | 2.30298100  | 4.08816800  | 0.73444200  |
| C | 4.94366200  | 2.87319600  | 0.12402600  |
| C | 5.39307200  | 2.97702000  | 1.46321700  |
| C | 6.15319700  | 4.15358600  | 2.02190900  |
| C | 5.13323100  | 1.91399800  | 2.33632500  |
| C | 4.49230000  | 0.74143700  | 1.92908800  |
| C | 4.12943100  | 0.63562200  | 0.58387000  |
| C | 4.32651200  | 1.67427900  | -0.33102400 |

|   |             |             |             |
|---|-------------|-------------|-------------|
| C | 3.80525900  | 1.45514400  | -1.73368000 |
| C | 4.25559800  | -0.39826800 | 2.88189600  |
| H | 3.56038100  | 6.59432500  | -0.32341300 |
| H | 4.21436600  | 8.86218800  | 0.41039300  |
| H | 6.61305200  | 9.42453500  | 0.68262200  |
| H | 11.19149900 | 8.39826100  | -0.95199400 |
| H | 12.55551200 | 6.90899300  | -2.38487100 |
| H | 11.83427700 | 4.56700400  | -2.77782400 |
| H | 10.21195900 | 9.37999300  | 0.60571900  |
| H | 8.59211500  | 9.75856400  | 1.17751700  |
| H | 8.91750900  | 9.70204500  | -0.57830700 |
| H | 10.19472400 | 7.30080300  | 2.02022700  |
| H | 8.52018000  | 7.63406900  | 2.56092200  |
| H | 8.93833400  | 6.06234100  | 1.82039500  |
| H | 3.65346200  | 6.09250600  | -4.71037800 |
| H | 4.88781300  | 6.05657300  | -3.42455600 |
| H | 4.61958700  | 4.61998900  | -4.38468900 |
| H | 1.52239700  | 5.47568200  | -4.41801700 |
| H | -1.52417300 | 5.08814300  | -2.29325600 |
| H | -0.90877300 | 5.71222800  | -3.84916900 |
| H | -1.07582500 | 3.96519300  | -3.59408400 |
| H | 0.03522500  | 4.34259700  | -0.56115500 |
| H | 1.38747700  | 4.41587500  | 1.24721800  |
| H | 3.14665000  | 4.61615300  | 1.19627800  |
| H | 2.43897100  | 3.01804400  | 0.94702700  |
| H | 6.47267600  | 3.93666100  | 3.04931400  |
| H | 7.05814600  | 4.35094600  | 1.43484400  |
| H | 5.55671200  | 5.07765800  | 2.04060000  |
| H | 5.47310100  | 1.99826400  | 3.37083200  |
| H | 3.66314700  | -0.28727300 | 0.22944400  |
| H | 3.78125800  | 0.37892300  | -1.95452000 |
| H | 4.41170900  | 1.94231900  | -2.50478400 |
| H | 2.77729800  | 1.83896400  | -1.83388000 |
| H | 3.26600000  | -0.85290800 | 2.72020700  |
| H | 5.01181400  | -1.18313300 | 2.72500400  |
| H | 4.32695000  | -0.07206400 | 3.92893900  |

---

**Table S26**  
**B/N-Prod**

---

Atomic Coordinates (Angstroms)

| Number | X           | Y           | Z           |
|--------|-------------|-------------|-------------|
| N      | 2.66816900  | -0.09747800 | 0.39094700  |
| N      | 1.10837800  | 0.21179600  | 1.71416600  |
| N      | 0.19514200  | -0.14558500 | 1.08966400  |
| O      | -1.06995000 | 0.10025600  | 1.54538400  |
| B      | -2.06579500 | 0.40993100  | 0.39856200  |
| C      | -1.91689900 | 1.96425100  | -0.03013700 |
| C      | -0.69543300 | 2.53364500  | -0.42973500 |
| O      | 0.40985700  | 1.66171100  | -0.44125200 |
| C      | 1.69279400  | 2.11495100  | -0.52236200 |
| C      | 2.77377000  | 1.24696400  | -0.20199300 |
| C      | 4.07991600  | 1.69920700  | -0.42863400 |
| C      | 4.33236600  | 2.95114500  | -0.96588100 |
| C      | 3.26752500  | 3.80476700  | -1.23418100 |
| C      | 1.94807100  | 3.41184200  | -1.00411100 |
| C      | 0.80440300  | 4.38047600  | -1.33443400 |
| C      | -0.53942800 | 3.85489600  | -0.83344100 |
| C      | -1.68388100 | 4.66626700  | -0.84565700 |
| C      | -2.91727700 | 4.15612600  | -0.45661700 |
| C      | -3.02231900 | 2.82421600  | -0.04998200 |
| C      | 1.09875100  | 5.74973900  | -0.67558800 |
| C      | 0.71902700  | 4.52399400  | -2.87597300 |
| C      | -1.77857500 | -0.65125200 | -0.79497600 |
| C      | -1.41165200 | -0.34062800 | -2.10064100 |
| F      | -1.22176300 | 0.93674400  | -2.51803500 |
| C      | -1.14765300 | -1.31884400 | -3.05119800 |
| F      | -0.64741800 | -0.99299900 | -4.26625400 |
| C      | -1.28892900 | -2.65477500 | -2.71708800 |
| F      | -0.97773100 | -3.60014300 | -3.62913800 |
| C      | -1.62933300 | -3.01249800 | -1.42034600 |
| C      | -1.86070900 | -2.00977800 | -0.48500200 |
| F      | -2.15631100 | -2.39703400 | 0.77817800  |
| F      | -1.66690700 | -4.31991300 | -1.07431200 |

|   |             |             |             |
|---|-------------|-------------|-------------|
| C | -3.48479500 | 0.11410100  | 1.11464100  |
| C | -4.61284500 | 0.01659700  | 0.30880100  |
| F | -4.48601800 | 0.22211600  | -1.02917100 |
| C | -5.88149100 | -0.25076500 | 0.81043500  |
| F | -6.95293100 | -0.32673300 | -0.00397700 |
| C | -6.03443900 | -0.43743900 | 2.18173600  |
| F | -7.25043300 | -0.70339800 | 2.69594000  |
| C | -4.93179800 | -0.33665700 | 3.02128200  |
| C | -3.67773100 | -0.05362000 | 2.48392700  |
| F | -2.66639600 | 0.05393300  | 3.37425700  |
| F | -5.08152300 | -0.50869300 | 4.35044000  |
| C | 3.80808700  | -0.35468600 | 1.29655400  |
| C | 3.93738300  | 0.31273800  | 2.54491800  |
| C | 3.02454800  | 1.38342500  | 3.12494100  |
| C | 5.05925400  | 0.01594600  | 3.32738100  |
| C | 6.06832100  | -0.85580300 | 2.91708200  |
| C | 7.26775700  | -1.11558800 | 3.79488900  |
| C | 5.95036800  | -1.42730800 | 1.65356300  |
| C | 4.84856600  | -1.18608600 | 0.82520400  |
| C | 4.89664500  | -1.78877000 | -0.56490300 |
| C | 2.16883300  | -1.23675000 | -0.34169700 |
| C | 1.91018000  | -1.21604700 | -1.74008000 |
| C | 1.91434100  | 0.00592500  | -2.63409400 |
| C | 1.62610000  | -2.42784400 | -2.38430500 |
| C | 1.53921300  | -3.64556300 | -1.71337100 |
| C | 1.69700100  | -3.62561000 | -0.32663500 |
| C | 1.99756200  | -2.46221400 | 0.37958600  |
| C | 2.15922200  | -2.62528400 | 1.87823200  |
| C | 1.18643300  | -4.93064900 | -2.42006800 |
| H | 4.90456300  | 1.04546800  | -0.17833200 |
| H | 5.35556300  | 3.25794900  | -1.16118600 |
| H | 3.46684900  | 4.79191800  | -1.63944000 |
| H | -1.61123600 | 5.69984400  | -1.17362700 |
| H | -3.79962900 | 4.79228800  | -0.47412300 |
| H | -3.99169000 | 2.44170200  | 0.25335100  |
| H | 0.30761900  | 6.46939900  | -0.91201700 |
| H | 2.04475700  | 6.17101900  | -1.03460900 |
| H | 1.15310700  | 5.63846000  | 0.41438300  |

|   |             |             |             |
|---|-------------|-------------|-------------|
| H | -0.07914700 | 5.22733600  | -3.14486200 |
| H | 1.66833600  | 4.89318900  | -3.28697400 |
| H | 0.48869600  | 3.55192700  | -3.32987400 |
| H | 3.59409700  | 1.97739400  | 3.85080900  |
| H | 2.62913600  | 2.05397400  | 2.35715100  |
| H | 2.16704100  | 0.94629500  | 3.64592800  |
| H | 5.15500400  | 0.51698400  | 4.28966400  |
| H | 8.03169300  | -1.69434000 | 3.25831800  |
| H | 7.71981500  | -0.16781900 | 4.12750200  |
| H | 6.97768900  | -1.68008900 | 4.69558700  |
| H | 6.74969600  | -2.05945900 | 1.27412900  |
| H | 5.93062700  | -2.06706300 | -0.79535900 |
| H | 4.55446100  | -1.08624700 | -1.33106100 |
| H | 4.27377400  | -2.68630800 | -0.64683200 |
| H | 1.74210200  | -0.31077000 | -3.66693100 |
| H | 1.08923100  | 0.67062400  | -2.36764800 |
| H | 2.84984000  | 0.57162300  | -2.58904400 |
| H | 1.41901500  | -2.39994600 | -3.45138200 |
| H | 1.57429500  | -4.55304800 | 0.22974700  |
| H | 1.63948800  | -3.53934700 | 2.19261400  |
| H | 1.73896900  | -1.78396800 | 2.43318700  |
| H | 3.21499200  | -2.71408700 | 2.16472200  |
| H | 1.87720900  | -5.73626100 | -2.13944800 |
| H | 0.17281100  | -5.23106100 | -2.12800300 |
| H | 1.19850700  | -4.80959000 | -3.50724500 |

**Table S27**  
**B/As-Prod**

Atomic Coordinates (Angstroms)

| Number | X           | Y           | Z          |
|--------|-------------|-------------|------------|
| As     | 2.82475300  | 0.45686400  | 0.65674500 |
| N      | 1.82538000  | 0.67958600  | 2.33948800 |
| N      | 0.63109600  | 0.42165100  | 2.30820900 |
| O      | 0.17333400  | -0.17354700 | 1.23156800 |
| B      | -1.29584400 | 0.09618000  | 0.81865000 |

|   |             |             |             |
|---|-------------|-------------|-------------|
| C | -1.59045200 | 1.68671800  | 1.00813100  |
| C | -0.68011900 | 2.65932500  | 0.57178500  |
| O | 0.52573000  | 2.19251500  | 0.03617600  |
| C | 1.61852100  | 2.98704100  | 0.12854300  |
| C | 2.85920200  | 2.34972300  | 0.27668500  |
| C | 4.02337400  | 3.11805800  | 0.38418800  |
| C | 3.92829200  | 4.50958000  | 0.33337700  |
| C | 2.68042900  | 5.12911000  | 0.20073200  |
| C | 1.50179100  | 4.38228500  | 0.09357100  |
| C | 0.10135000  | 4.95743700  | -0.11207500 |
| C | -0.89134200 | 4.04132900  | 0.61468100  |
| C | -2.07279100 | 4.48651200  | 1.22040200  |
| C | -2.99072400 | 3.56576300  | 1.72510400  |
| C | -2.75403000 | 2.19385800  | 1.60519800  |
| C | 0.01151000  | 6.41105300  | 0.36382700  |
| C | -0.22597400 | 4.89735400  | -1.62859700 |
| C | -1.25413700 | -0.44765700 | -0.73551100 |
| C | -1.47468800 | 0.30324200  | -1.89098600 |
| F | -1.72262100 | 1.62099200  | -1.83502000 |
| C | -1.43208000 | -0.23913300 | -3.17927300 |
| F | -1.59496600 | 0.53987400  | -4.25124000 |
| C | -1.18959100 | -1.59978700 | -3.34172100 |
| F | -1.10936700 | -2.13072400 | -4.56498800 |
| C | -0.97702400 | -2.39432600 | -2.21784100 |
| C | -0.98403500 | -1.80319900 | -0.95678500 |
| F | -0.70646800 | -2.61644600 | 0.07563400  |
| F | -0.71249300 | -3.69576600 | -2.36421500 |
| C | -2.34142400 | -0.84784700 | 1.65067800  |
| C | -3.66827300 | -0.92158700 | 1.21736800  |
| F | -4.06319200 | -0.18873500 | 0.16121200  |
| C | -4.63943600 | -1.72129600 | 1.82115100  |
| F | -5.89349500 | -1.74085700 | 1.36807000  |
| C | -4.27864600 | -2.51459100 | 2.91073000  |
| F | -5.18282500 | -3.29008000 | 3.50644500  |
| C | -2.96245800 | -2.48771200 | 3.37002500  |
| C | -2.02433200 | -1.66837600 | 2.73477500  |
| F | -0.77537700 | -1.72886700 | 3.22431400  |
| F | -2.60716900 | -3.25260000 | 4.40397400  |

|   |             |             |             |
|---|-------------|-------------|-------------|
| C | 4.65683200  | 0.00031100  | 1.15951900  |
| C | 5.03347100  | -0.33960800 | 2.48588800  |
| C | 4.09253400  | -0.41065600 | 3.66287900  |
| C | 6.37739100  | -0.64771500 | 2.73153800  |
| C | 7.35491300  | -0.63488800 | 1.73256700  |
| C | 8.78554700  | -0.97793100 | 2.05278100  |
| C | 6.95386100  | -0.30404900 | 0.43835300  |
| C | 5.62415600  | 0.00648600  | 0.12231900  |
| C | 5.31876100  | 0.31103800  | -1.32444200 |
| C | 2.37222500  | -0.73999400 | -0.81202200 |
| C | 2.13437200  | -0.31003600 | -2.13854900 |
| C | 1.95740700  | 1.12508900  | -2.56043300 |
| C | 2.01985200  | -1.29717000 | -3.12368100 |
| C | 2.10365200  | -2.66535900 | -2.84239600 |
| C | 2.25908600  | -3.04959600 | -1.50910900 |
| C | 2.38332100  | -2.11243900 | -0.47731900 |
| C | 2.46600600  | -2.59812600 | 0.94663000  |
| C | 1.96385900  | -3.67741800 | -3.94693600 |
| H | 4.99051100  | 2.63620600  | 0.53368400  |
| H | 4.83131300  | 5.11746400  | 0.41643400  |
| H | 2.63048800  | 6.21810700  | 0.18015800  |
| H | -2.28630800 | 5.55344700  | 1.28915200  |
| H | -3.90652300 | 3.92029900  | 2.20373400  |
| H | -3.49776400 | 1.49964300  | 1.99721400  |
| H | -0.99575300 | 6.81304500  | 0.18932000  |
| H | 0.70620500  | 7.05137600  | -0.19896000 |
| H | 0.24056300  | 6.50176200  | 1.43618100  |
| H | -1.23455600 | 5.29929400  | -1.80865500 |
| H | 0.50184300  | 5.48960700  | -2.20583700 |
| H | -0.21241400 | 3.86255600  | -1.99846000 |
| H | 4.62781100  | -0.78513200 | 4.54575900  |
| H | 3.65986300  | 0.56921700  | 3.90320500  |
| H | 3.24207000  | -1.08060500 | 3.47464000  |
| H | 6.66669800  | -0.90978700 | 3.75256500  |
| H | 9.43847500  | -0.85592400 | 1.17676200  |
| H | 9.17424700  | -0.33959100 | 2.86268500  |
| H | 8.87111900  | -2.02192900 | 2.39736800  |
| H | 7.69622100  | -0.28678400 | -0.36366300 |



|   |            |             |             |
|---|------------|-------------|-------------|
| H | 6.24465700 | 0.55893600  | -1.86122300 |
| H | 4.63343700 | 1.15833300  | -1.45084900 |
| H | 4.86029200 | -0.55448300 | -1.82527600 |
| H | 1.82482900 | 1.18384400  | -3.64874100 |
| H | 1.06449500 | 1.55551500  | -2.08864400 |
| H | 2.81031700 | 1.76315700  | -2.29075100 |
| H | 1.83426400 | -0.97972900 | -4.15307300 |
| H | 2.25843100 | -4.11150000 | -1.25359100 |
| H | 2.39731900 | -3.69317700 | 0.98440800  |
| H | 1.63041300 | -2.19636000 | 1.53999500  |
| H | 3.41219700 | -2.31169700 | 1.42979000  |
| H | 1.00212300 | -3.54842400 | -4.46581300 |
| H | 2.76206200 | -3.55477100 | -4.69741600 |
| H | 2.00764800 | -4.70524600 | -3.56124500 |

**Table S28**  
**B/Sb-Prod**

Atomic Coordinates (Angstroms)

| Number | X           | Y           | Z           |
|--------|-------------|-------------|-------------|
| Sb     | 2.12903400  | 0.29722700  | 0.38273700  |
| N      | 1.07912700  | 0.64020500  | 2.32597200  |
| N      | -0.09356500 | 0.39518900  | 2.19209300  |
| O      | -0.47136900 | -0.17615000 | 1.05666500  |
| B      | -1.92333900 | 0.07665800  | 0.54805300  |
| C      | -2.22981700 | 1.66709100  | 0.70118900  |
| C      | -1.33179700 | 2.63948500  | 0.23874900  |
| O      | -0.12350800 | 2.17677700  | -0.29264600 |
| C      | 0.96089200  | 2.99598100  | -0.22048200 |
| C      | 2.20546500  | 2.37849000  | -0.06086500 |
| C      | 3.36011100  | 3.15969400  | 0.03916900  |
| C      | 3.24633700  | 4.55070000  | -0.03236700 |
| C      | 1.99107100  | 5.15144500  | -0.18130200 |
| C      | 0.82176900  | 4.38753400  | -0.28112800 |
| C      | -0.58686600 | 4.93617500  | -0.49703100 |
| C      | -1.56093200 | 4.02027300  | 0.25501700  |

|   |             |             |             |
|---|-------------|-------------|-------------|
| C | -2.74171100 | 4.46339500  | 0.86329700  |
| C | -3.64428100 | 3.54365200  | 1.39642200  |
| C | -3.39332700 | 2.17284300  | 1.30010800  |
| C | -0.69899300 | 6.39886200  | -0.05525500 |
| C | -0.91744500 | 4.83474300  | -2.01055300 |
| C | -1.80527400 | -0.50359500 | -0.98748700 |
| C | -2.00937700 | 0.21469300  | -2.16699600 |
| F | -2.27866400 | 1.52818900  | -2.15161400 |
| C | -1.93094600 | -0.36029800 | -3.43901300 |
| F | -2.06257600 | 0.39165600  | -4.53447400 |
| C | -1.67260300 | -1.72166600 | -3.56086100 |
| F | -1.55656600 | -2.28144700 | -4.76669700 |
| C | -1.48640600 | -2.48764300 | -2.41272700 |
| C | -1.52072300 | -1.86299600 | -1.16840500 |
| F | -1.26409700 | -2.64793900 | -0.10856700 |
| F | -1.22421900 | -3.79315800 | -2.52188700 |
| C | -3.00705400 | -0.86057300 | 1.33759800  |
| C | -4.31660900 | -0.91265400 | 0.85031300  |
| F | -4.65727300 | -0.16818600 | -0.21599400 |
| C | -5.32214800 | -1.70269400 | 1.40845300  |
| F | -6.55694600 | -1.70103500 | 0.90535900  |
| C | -5.01586500 | -2.51057500 | 2.50414900  |
| F | -5.95371800 | -3.27777700 | 3.05638300  |
| C | -3.71856200 | -2.50721900 | 3.01477300  |
| C | -2.74391500 | -1.69692600 | 2.42408800  |
| F | -1.51549500 | -1.78360600 | 2.95782600  |
| F | -3.41477200 | -3.28709000 | 4.05364100  |
| C | 4.17886600  | -0.16740400 | 0.88042600  |
| C | 4.54890400  | -0.57942900 | 2.18209300  |
| C | 3.56379000  | -0.73958900 | 3.31301900  |
| C | 5.89705800  | -0.86387500 | 2.43040000  |
| C | 6.88033300  | -0.75623700 | 1.44038900  |
| C | 8.32300100  | -1.05071600 | 1.75781000  |
| C | 6.48091900  | -0.36611500 | 0.16046800  |
| C | 5.14353900  | -0.07757600 | -0.14893000 |
| C | 4.80742900  | 0.27970900  | -1.57675500 |
| C | 1.74646900  | -1.00140700 | -1.28972700 |
| C | 1.53515300  | -0.53599000 | -2.60202100 |

|   |             |             |             |
|---|-------------|-------------|-------------|
| C | 1.34575100  | 0.91653600  | -2.95351600 |
| C | 1.47116500  | -1.49469100 | -3.62201300 |
| C | 1.58150200  | -2.86706400 | -3.37254600 |
| C | 1.73856800  | -3.28741300 | -2.04775300 |
| C | 1.81116800  | -2.37665800 | -0.98854100 |
| C | 1.91897400  | -2.88190400 | 0.42855000  |
| C | 1.43017000  | -3.86384700 | -4.48935500 |
| H | 4.33437100  | 2.69295900  | 0.19823700  |
| H | 4.14029800  | 5.17287500  | 0.04575900  |
| H | 1.92720200  | 6.23928100  | -0.21957200 |
| H | -2.96656900 | 5.52906000  | 0.91211000  |
| H | -4.55888800 | 3.89761000  | 1.87767200  |
| H | -4.12443900 | 1.47758000  | 1.71368800  |
| H | -1.71200000 | 6.78214600  | -0.23887100 |
| H | -0.01325300 | 7.03524900  | -0.63324100 |
| H | -0.47082700 | 6.51847600  | 1.01445900  |
| H | -1.93366600 | 5.21409800  | -2.19705600 |
| H | -0.20201300 | 5.42695700  | -2.60303000 |
| H | -0.88468200 | 3.79207900  | -2.35637700 |
| H | 4.05888600  | -1.15946400 | 4.19903100  |
| H | 3.10265300  | 0.21663400  | 3.59811200  |
| H | 2.73658100  | -1.41515300 | 3.04475400  |
| H | 6.18602500  | -1.18218000 | 3.43586100  |
| H | 8.94560400  | -1.05436500 | 0.85176400  |
| H | 8.73527300  | -0.29544400 | 2.44778500  |
| H | 8.42978100  | -2.02943600 | 2.25212900  |
| H | 7.22957200  | -0.28777900 | -0.63245900 |
| H | 5.71953300  | 0.51806600  | -2.14073000 |
| H | 4.14286900  | 1.15210200  | -1.65116200 |
| H | 4.30514200  | -0.55601500 | -2.08769600 |
| H | 1.08037600  | 1.02228600  | -4.01395700 |
| H | 0.53578500  | 1.36155900  | -2.36131500 |
| H | 2.25353000  | 1.51276400  | -2.77285100 |
| H | 1.29635400  | -1.15333100 | -4.64572000 |
| H | 1.77551000  | -4.35661100 | -1.82567600 |
| H | 1.82196100  | -3.97514800 | 0.46273900  |
| H | 1.11257100  | -2.46780600 | 1.05535800  |
| H | 2.89038400  | -2.62469200 | 0.88199900  |

|   |            |             |             |
|---|------------|-------------|-------------|
| H | 0.36091500 | -4.06437800 | -4.66467300 |
| H | 1.85333700 | -3.48351400 | -5.43109900 |
| H | 1.91538600 | -4.82061300 | -4.24733700 |

---

**Table S29**  
**B/Bi-Prod**

---

Atomic Coordinates (Angstroms)

| Number | X           | Y           | Z           |
|--------|-------------|-------------|-------------|
| Bi     | 1.93305100  | 0.20035800  | 0.40838000  |
| N      | 0.77195400  | 0.65281700  | 2.51479100  |
| N      | -0.36587100 | 0.41215400  | 2.29191300  |
| O      | -0.74462600 | -0.17771200 | 1.17977900  |
| B      | -2.17548000 | 0.10792900  | 0.59641400  |
| C      | -2.44758400 | 1.70340900  | 0.70834900  |
| C      | -1.53049400 | 2.65632500  | 0.23764200  |
| O      | -0.31953500 | 2.17197000  | -0.25834200 |
| C      | 0.76960700  | 2.99610100  | -0.22299700 |
| C      | 2.01806600  | 2.38762800  | -0.07296200 |
| C      | 3.17209300  | 3.16816900  | -0.00525800 |
| C      | 3.05657500  | 4.55907500  | -0.10408000 |
| C      | 1.79968800  | 5.15393900  | -0.25391600 |
| C      | 0.62979800  | 4.38582500  | -0.32168200 |
| C      | -0.77675200 | 4.93277000  | -0.55309400 |
| C      | -1.75728200 | 4.03820800  | 0.21428300  |
| C      | -2.94579100 | 4.50180100  | 0.79183500  |
| C      | -3.86434200 | 3.60285100  | 1.33208700  |
| C      | -3.62018900 | 2.22920000  | 1.27155800  |
| C      | -0.88724000 | 6.40609900  | -0.14670600 |
| C      | -1.10254000 | 4.79650000  | -2.06506600 |
| C      | -1.97725300 | -0.51453400 | -0.91148800 |
| C      | -2.15398900 | 0.16670600  | -2.11728500 |
| F      | -2.44672500 | 1.47405000  | -2.14672400 |
| C      | -2.02842600 | -0.44596400 | -3.36679200 |
| F      | -2.13514900 | 0.26937800  | -4.48905700 |
| C      | -1.74253300 | -1.80568000 | -3.43917400 |

|   |             |             |             |
|---|-------------|-------------|-------------|
| F | -1.59212500 | -2.39782400 | -4.62445000 |
| C | -1.57194800 | -2.53394100 | -2.26447000 |
| C | -1.66288600 | -1.87324000 | -1.04105700 |
| F | -1.43574300 | -2.62114200 | 0.05276700  |
| F | -1.28126700 | -3.83569800 | -2.32627100 |
| C | -3.31513900 | -0.78792900 | 1.35002700  |
| C | -4.58735100 | -0.85476300 | 0.77290400  |
| F | -4.84645000 | -0.15219300 | -0.34273900 |
| C | -5.63601900 | -1.61313300 | 1.29400300  |
| F | -6.83100900 | -1.63067300 | 0.70375100  |
| C | -5.41663600 | -2.36633600 | 2.44831200  |
| F | -6.39776100 | -3.10164200 | 2.96662300  |
| C | -4.16198400 | -2.33842900 | 3.05554000  |
| C | -3.14183300 | -1.56025200 | 2.49934300  |
| F | -1.96167900 | -1.60318800 | 3.13669100  |
| F | -3.94298400 | -3.05890500 | 4.15616200  |
| C | 4.12289400  | -0.23338700 | 0.85513200  |
| C | 4.50035800  | -0.64177800 | 2.15040500  |
| C | 3.50834800  | -0.80169500 | 3.27659500  |
| C | 5.85310000  | -0.91410700 | 2.38946100  |
| C | 6.82444700  | -0.79256100 | 1.38780200  |
| C | 8.27385500  | -1.07325700 | 1.68959200  |
| C | 6.41055100  | -0.39867400 | 0.11299700  |
| C | 5.06611000  | -0.12131600 | -0.18439900 |
| C | 4.70035700  | 0.24734900  | -1.60176400 |
| C | 1.60838700  | -1.09436600 | -1.43353100 |
| C | 1.37551400  | -0.56403700 | -2.71135100 |
| C | 1.15068500  | 0.90082500  | -2.98174000 |
| C | 1.33432500  | -1.47245500 | -3.78123200 |
| C | 1.48662200  | -2.85046700 | -3.60095400 |
| C | 1.68569100  | -3.33170200 | -2.30149900 |
| C | 1.73730300  | -2.47482300 | -1.19672600 |
| C | 1.88990300  | -3.04561600 | 0.19183200  |
| C | 1.34277300  | -3.80604100 | -4.75455000 |
| H | 4.14982800  | 2.70492100  | 0.14624500  |
| H | 3.95088200  | 5.18380700  | -0.05133400 |
| H | 1.73378800  | 6.24018500  | -0.32088600 |
| H | -3.16500100 | 5.56957600  | 0.80843700  |

|   |             |             |             |
|---|-------------|-------------|-------------|
| H | -4.78534600 | 3.97430400  | 1.78709600  |
| H | -4.36413800 | 1.54606800  | 1.68306100  |
| H | -1.89792600 | 6.78856200  | -0.34445000 |
| H | -0.19695700 | 7.02636700  | -0.73636400 |
| H | -0.66314100 | 6.55059400  | 0.92079900  |
| H | -2.11733400 | 5.17305600  | -2.26516200 |
| H | -0.38322100 | 5.37300200  | -2.66812800 |
| H | -1.06920700 | 3.74581100  | -2.38584100 |
| H | 4.00010300  | -1.18937700 | 4.17919100  |
| H | 3.02436000  | 0.15093900  | 3.53897600  |
| H | 2.70183500  | -1.50579300 | 3.01353000  |
| H | 6.15548500  | -1.23135700 | 3.39165100  |
| H | 8.88410700  | -1.08287000 | 0.77510600  |
| H | 8.69097200  | -0.30696900 | 2.36455200  |
| H | 8.39524800  | -2.04548700 | 2.19328500  |
| H | 7.15234900  | -0.30730700 | -0.68539400 |
| H | 5.59845200  | 0.49745300  | -2.18331800 |
| H | 4.02619700  | 1.11480100  | -1.64875200 |
| H | 4.19118600  | -0.58613800 | -2.10991000 |
| H | 0.82350000  | 1.05402300  | -4.01897700 |
| H | 0.37429300  | 1.31135900  | -2.32385500 |
| H | 2.06481200  | 1.49463900  | -2.82358500 |
| H | 1.13891000  | -1.08440200 | -4.78438400 |
| H | 1.76887900  | -4.40885200 | -2.13566700 |
| H | 1.89771600  | -4.14352200 | 0.16649700  |
| H | 1.04582000  | -2.74216800 | 0.83228600  |
| H | 2.83016200  | -2.72078900 | 0.66771400  |
| H | 0.32378900  | -4.22631800 | -4.76150800 |
| H | 1.50161300  | -3.30482900 | -5.72012800 |
| H | 2.04938300  | -4.64611700 | -4.67479300 |

---
